# Supplementary material for: Medroxyprogesterone Acetate (MPA) Enhances HIV-1 Accumulation and Release in Primary Cervical Epithelial Cells by Inhibiting Lysosomal Activity
Source: MDPI journal article supplement (doi:10.3390/pathogens10091192), 2021-09-14
Supplement: s1 [file s1]

Fig S1

A

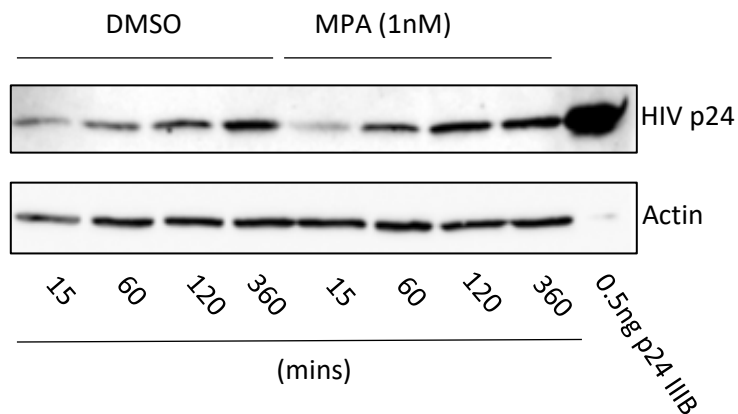

B

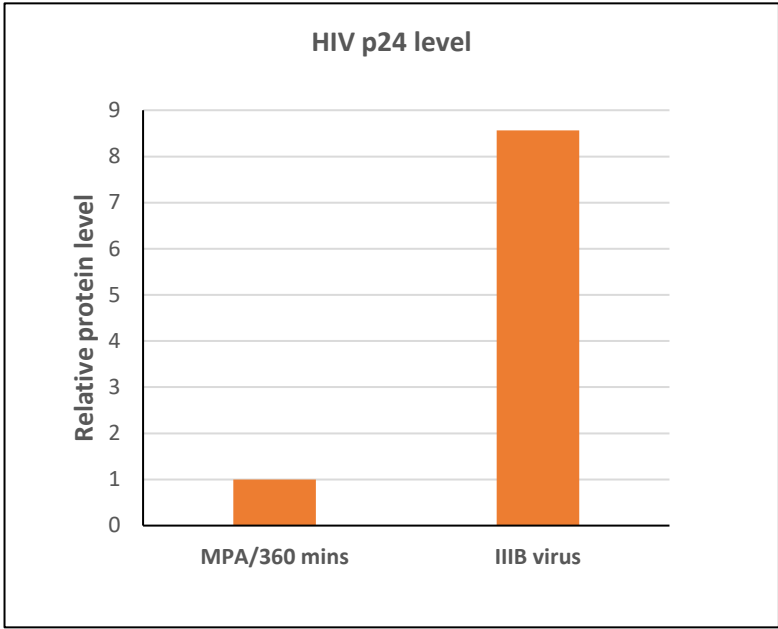

**Fig S1. The efficiency of HIV-1 IIIB uptake by VK2 cells.** (A) 0.5ng p24 content of HIV-1 IIIB virus was subjected to western blot analysis along with one group of sample from Fig 1A. (B) The relative protein level between MPA treated 360 mins sample and the 0.5ng p24 content of HIV-1 IIIB virus was analyzed by densitometry analysis. 60 ng p24 content of IIIB was exposed to the VK2 cells. The estimated efficiency of HIV-1 IIIB uptake by the VK2 cell (treated by MPA for 360 mins) equals:  $(0.5/8.5)/60 \approx 0.1\%$ .

# Original western blot images

Fig 1A

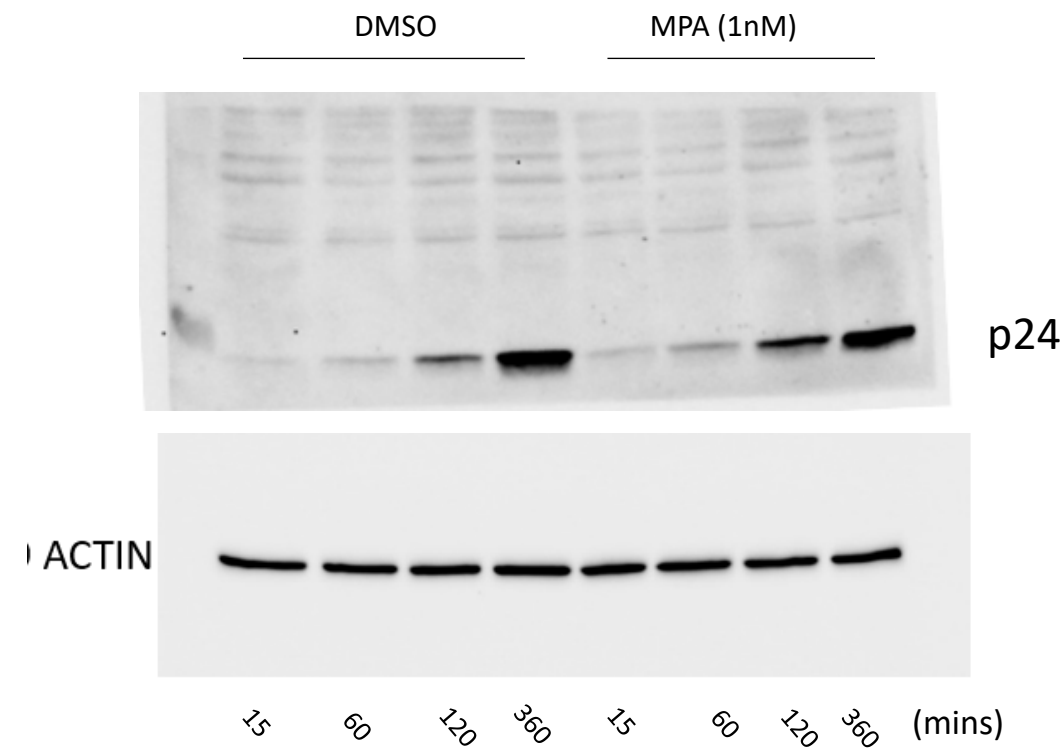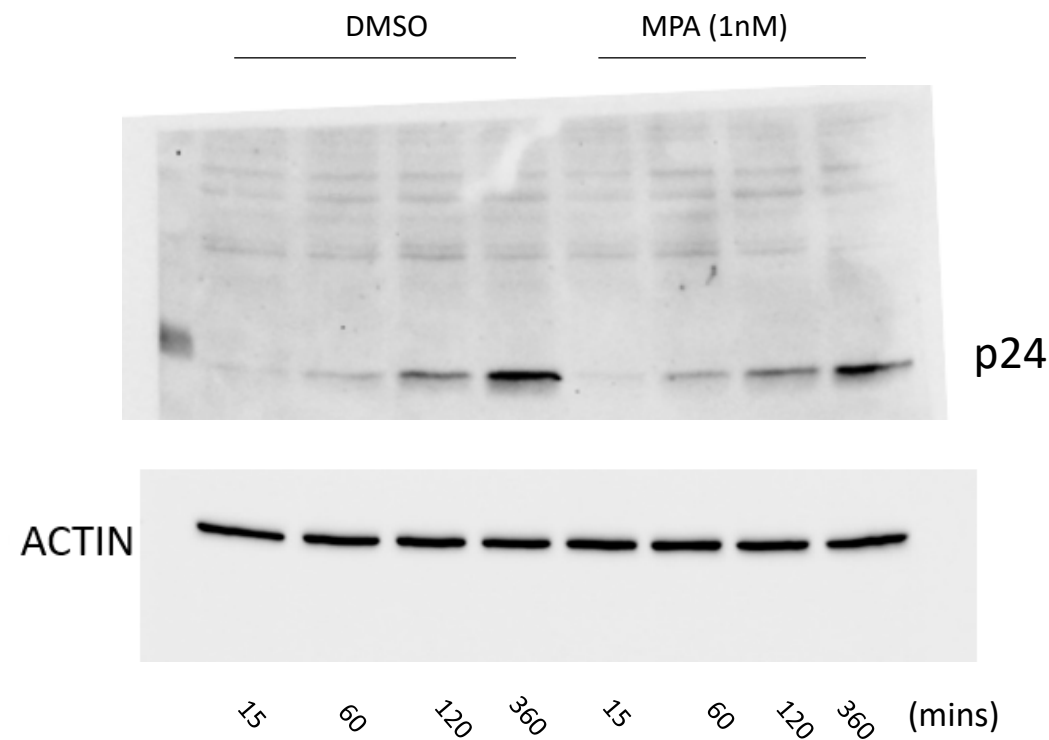

Fig 1A

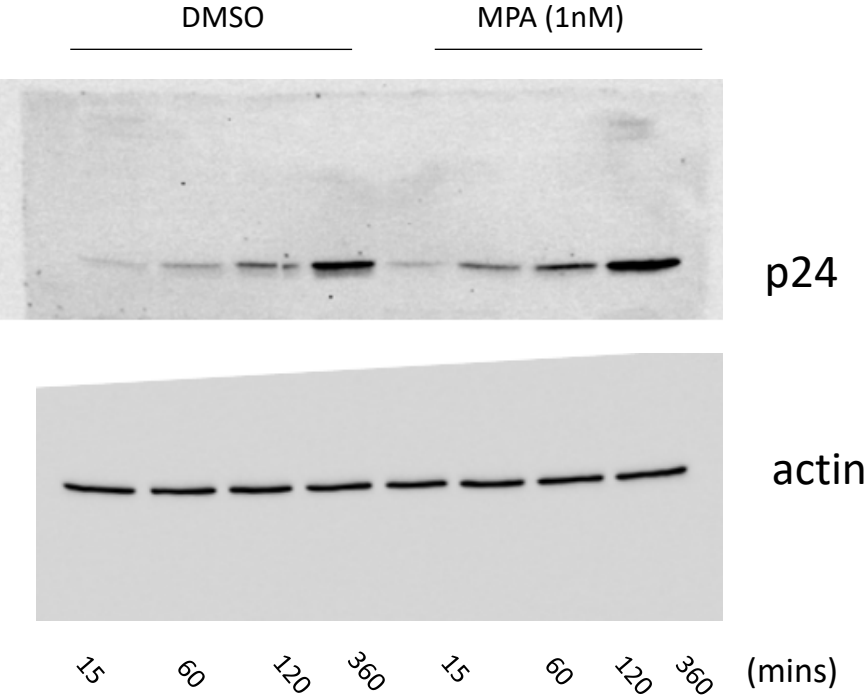

Fig 1B

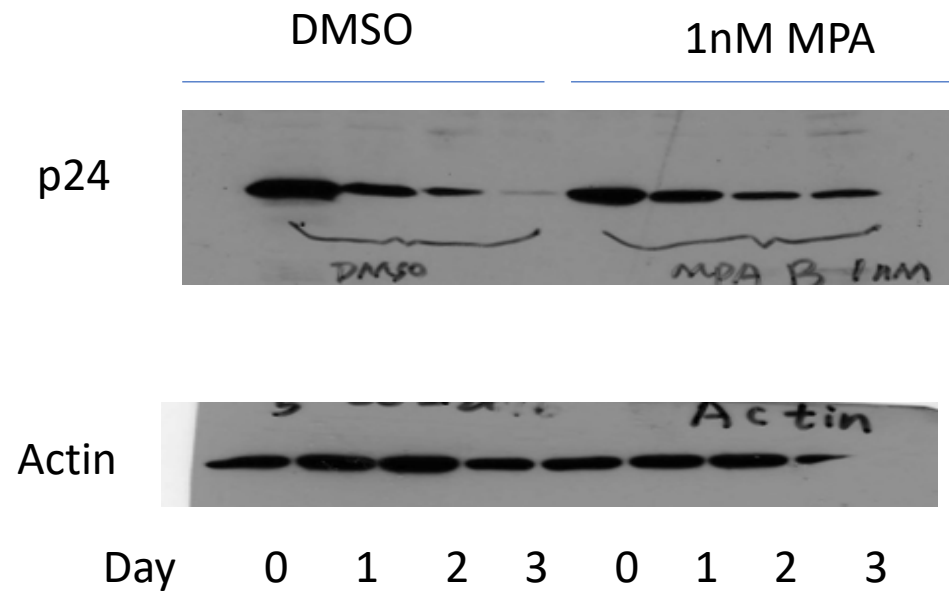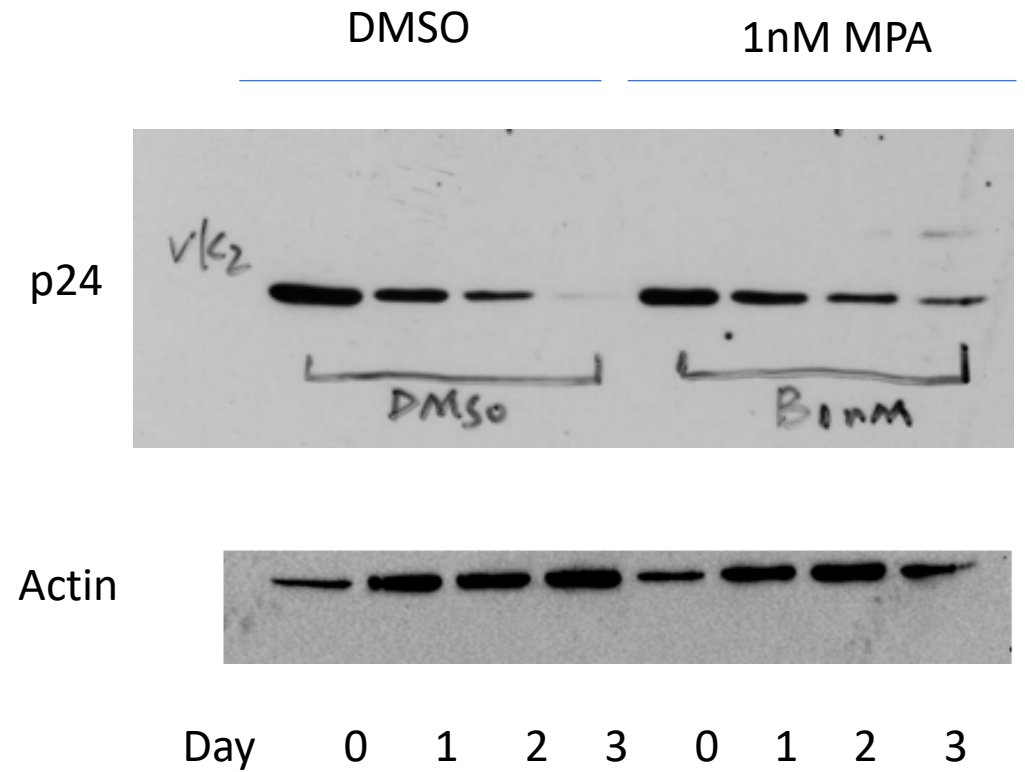

Fig 1B

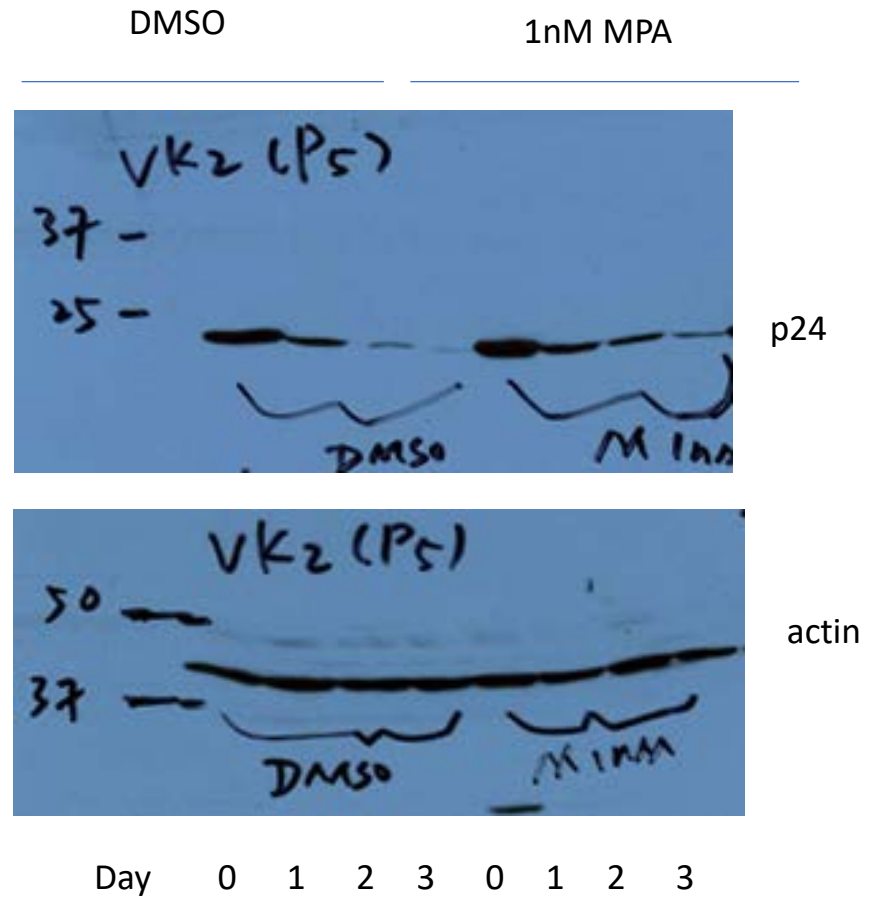

Fig 2A-1

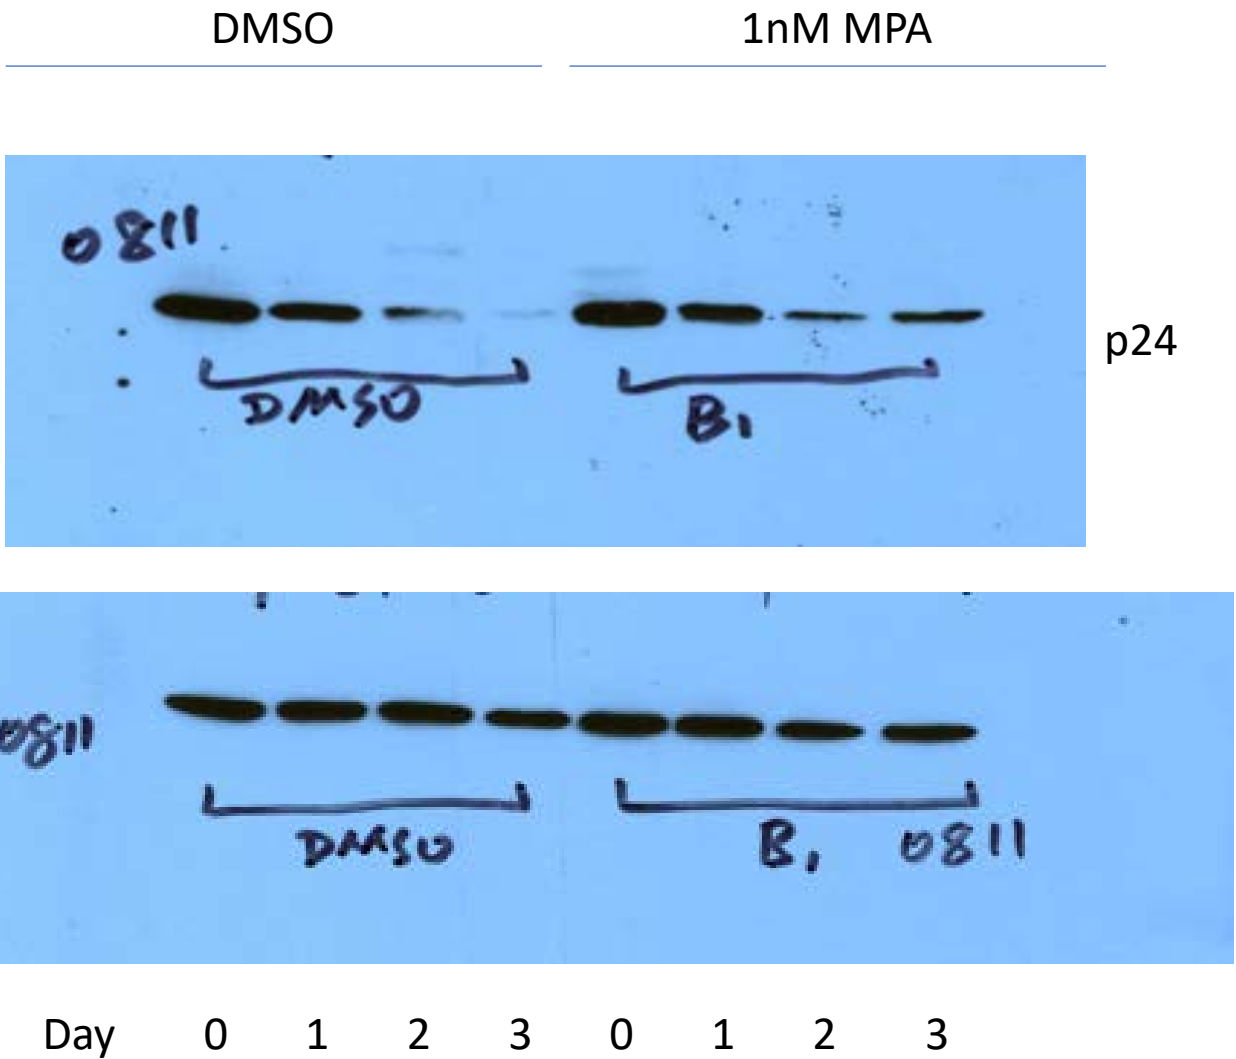

Fig 2A-2

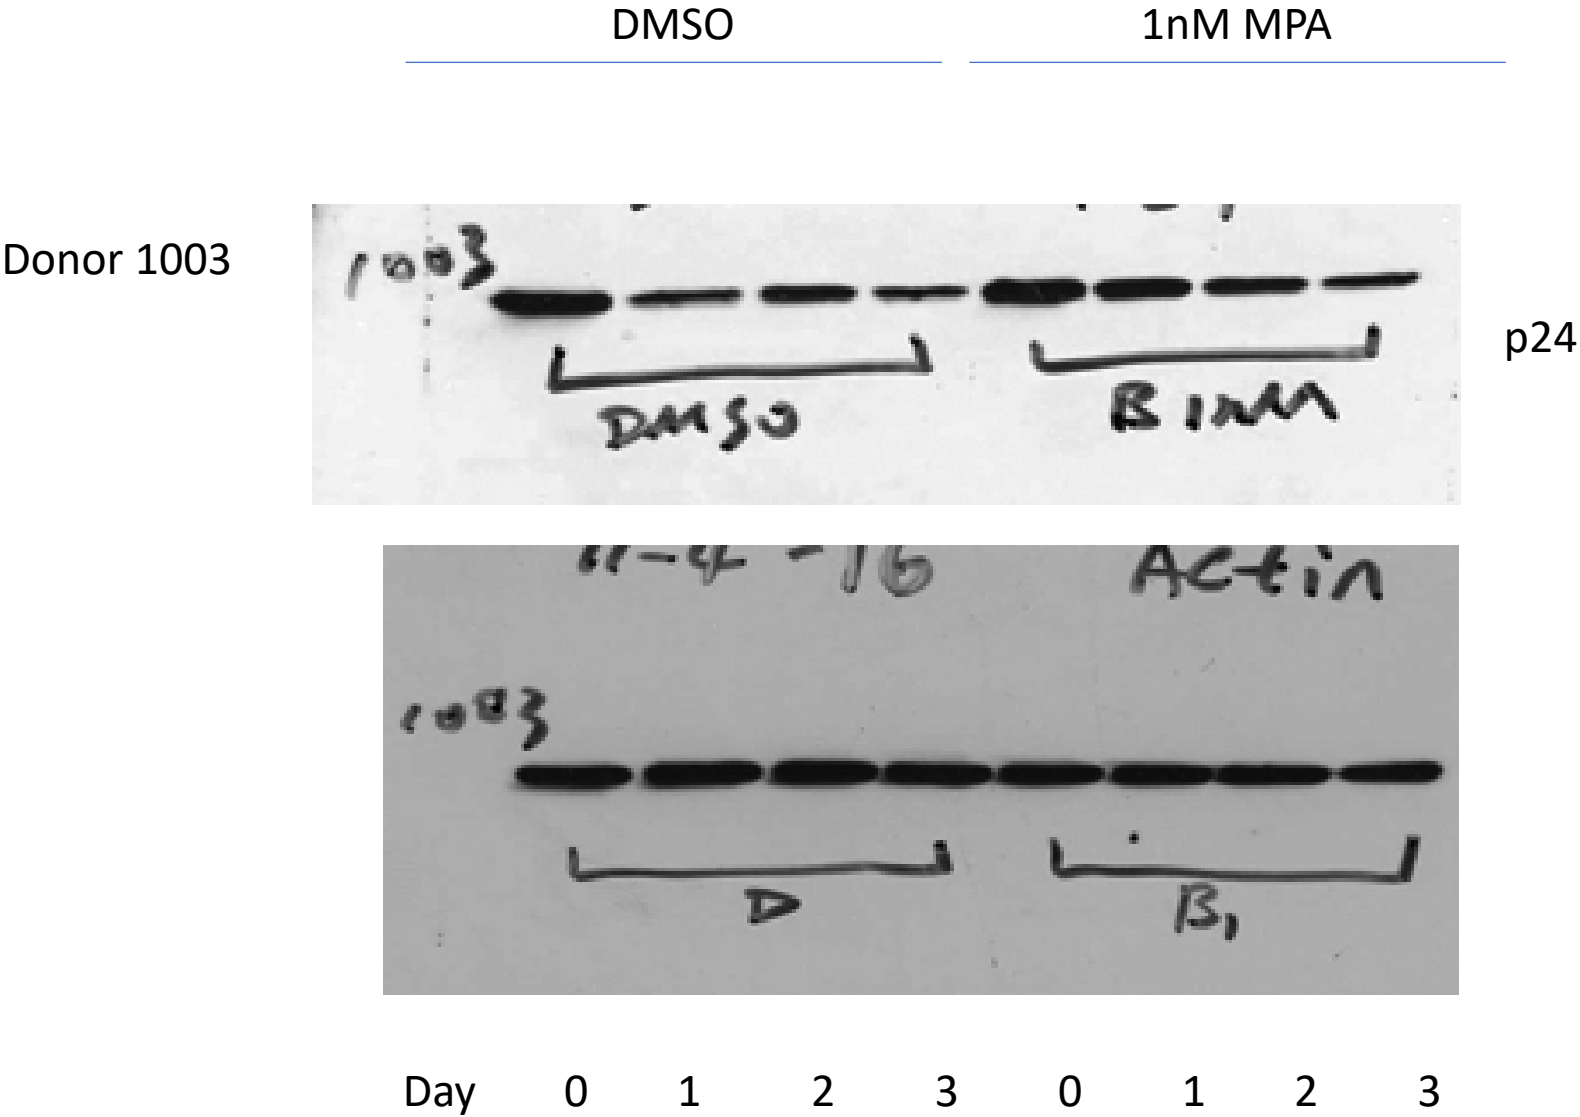

Fig 2B

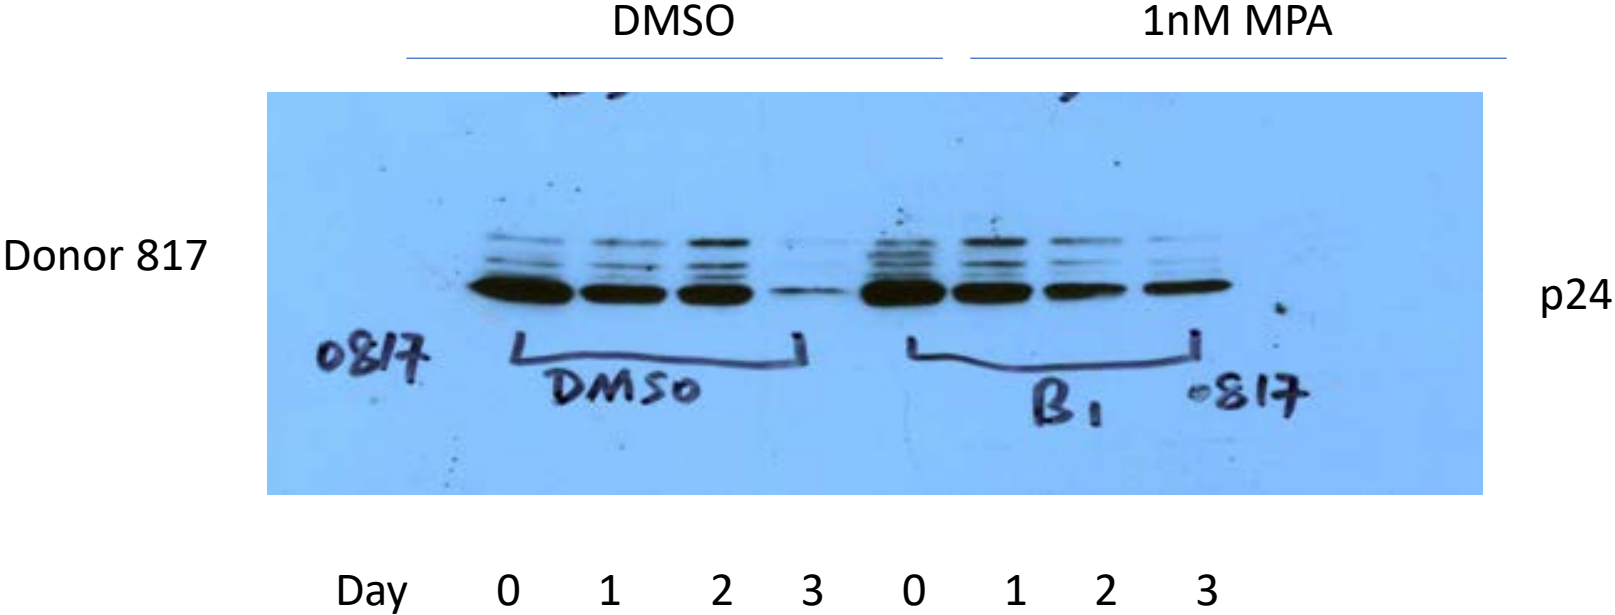



Fig 2B

Donor 0513

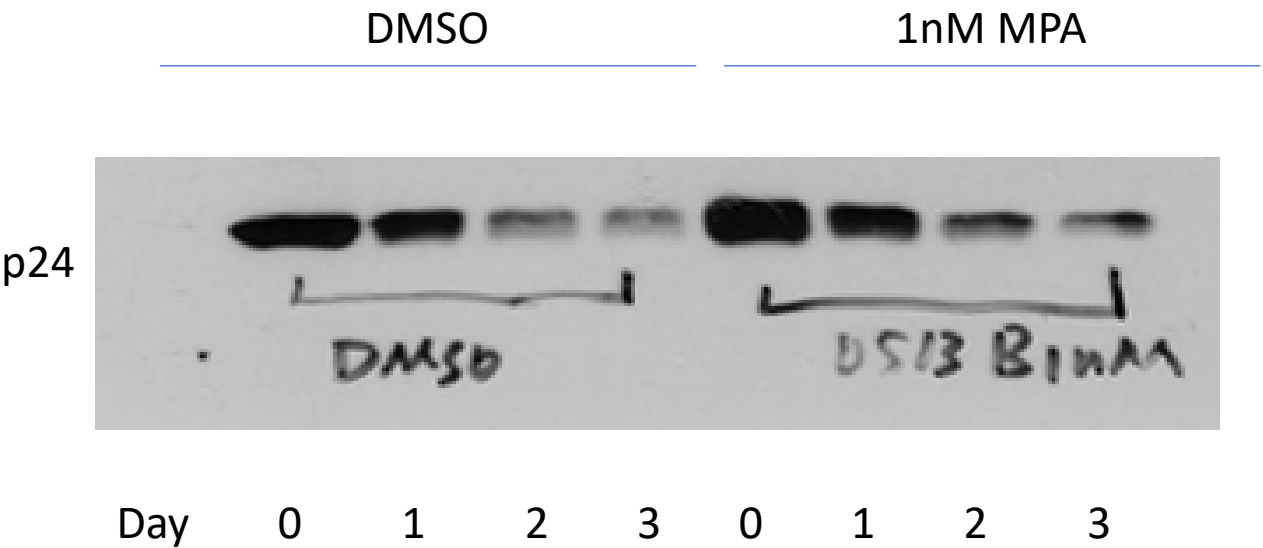

Fig 2B

Donor 322

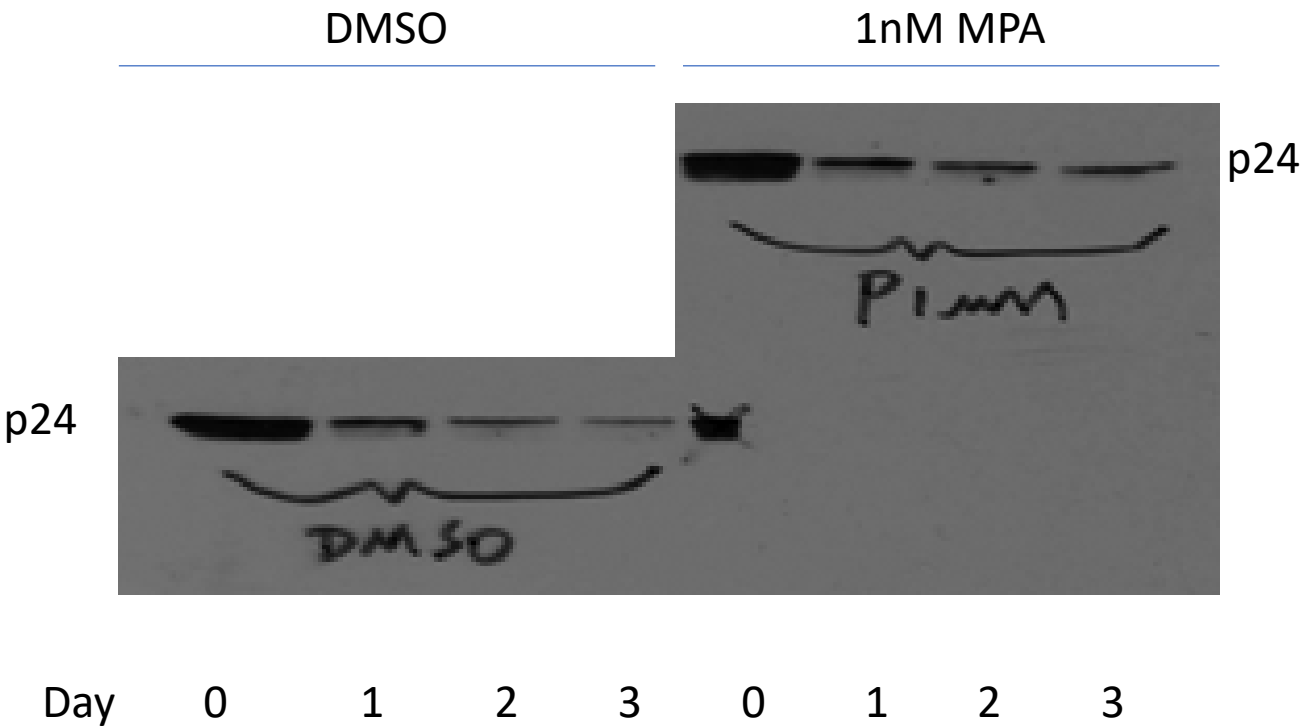

Fig 2B

Donor 714

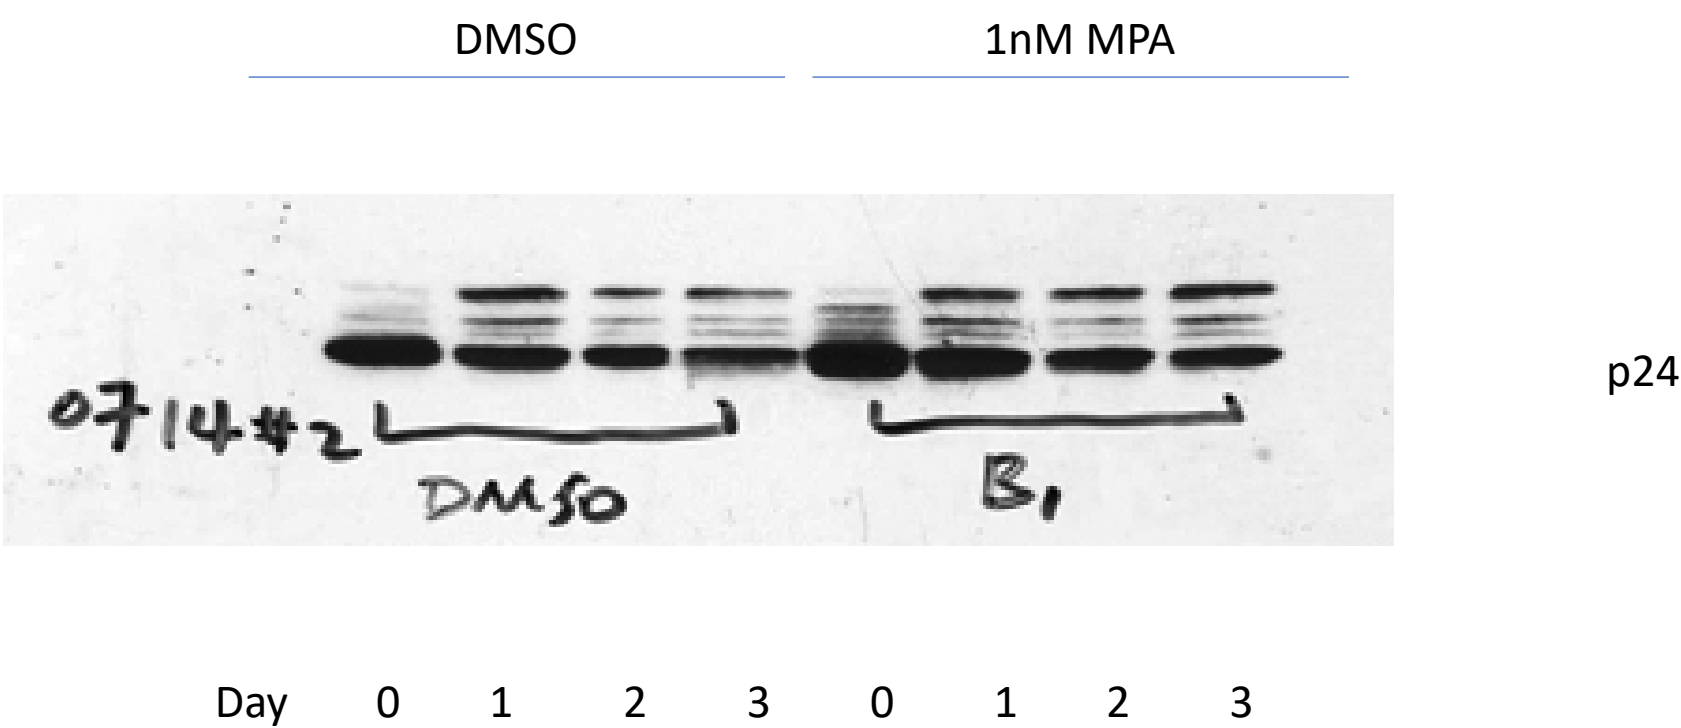

Fig 2B

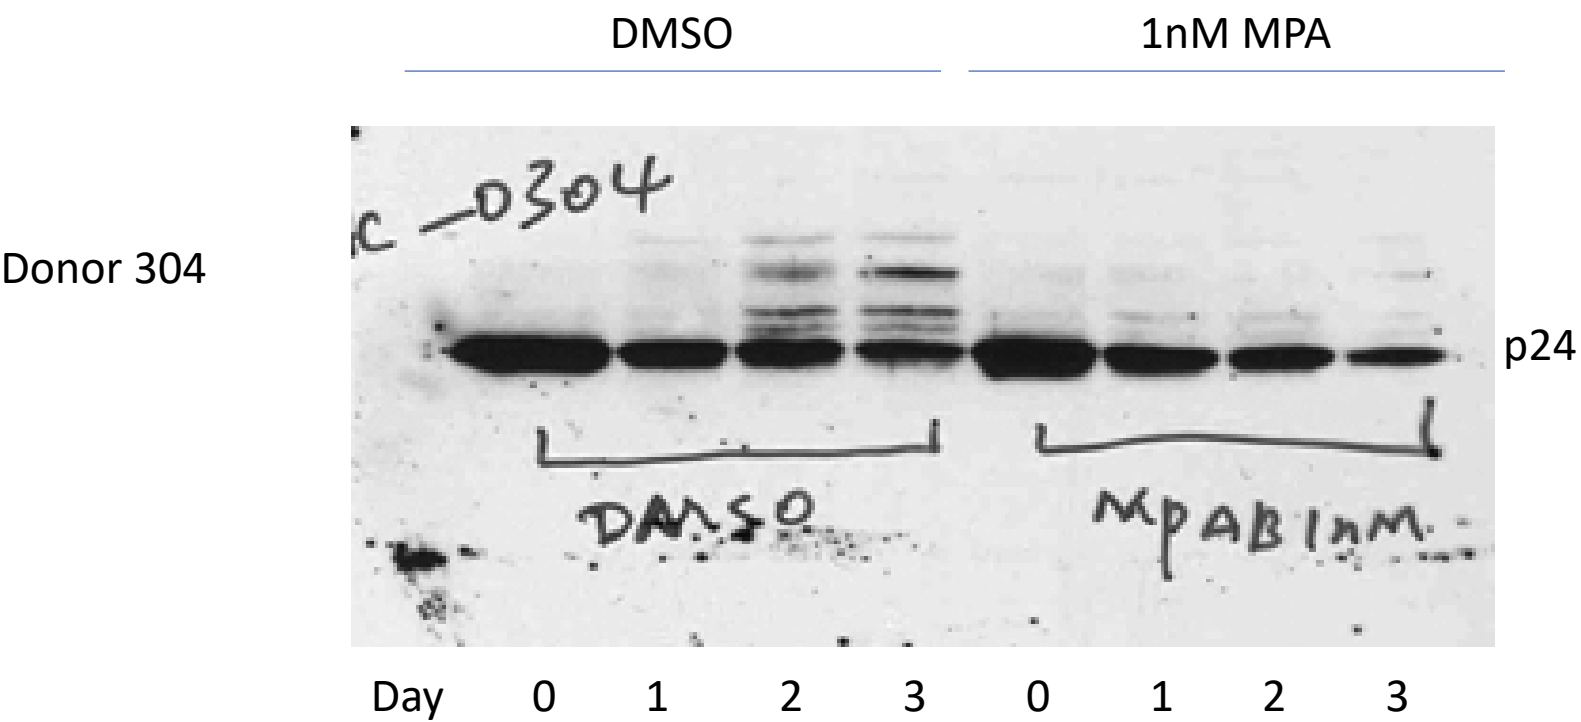

Fig 2B

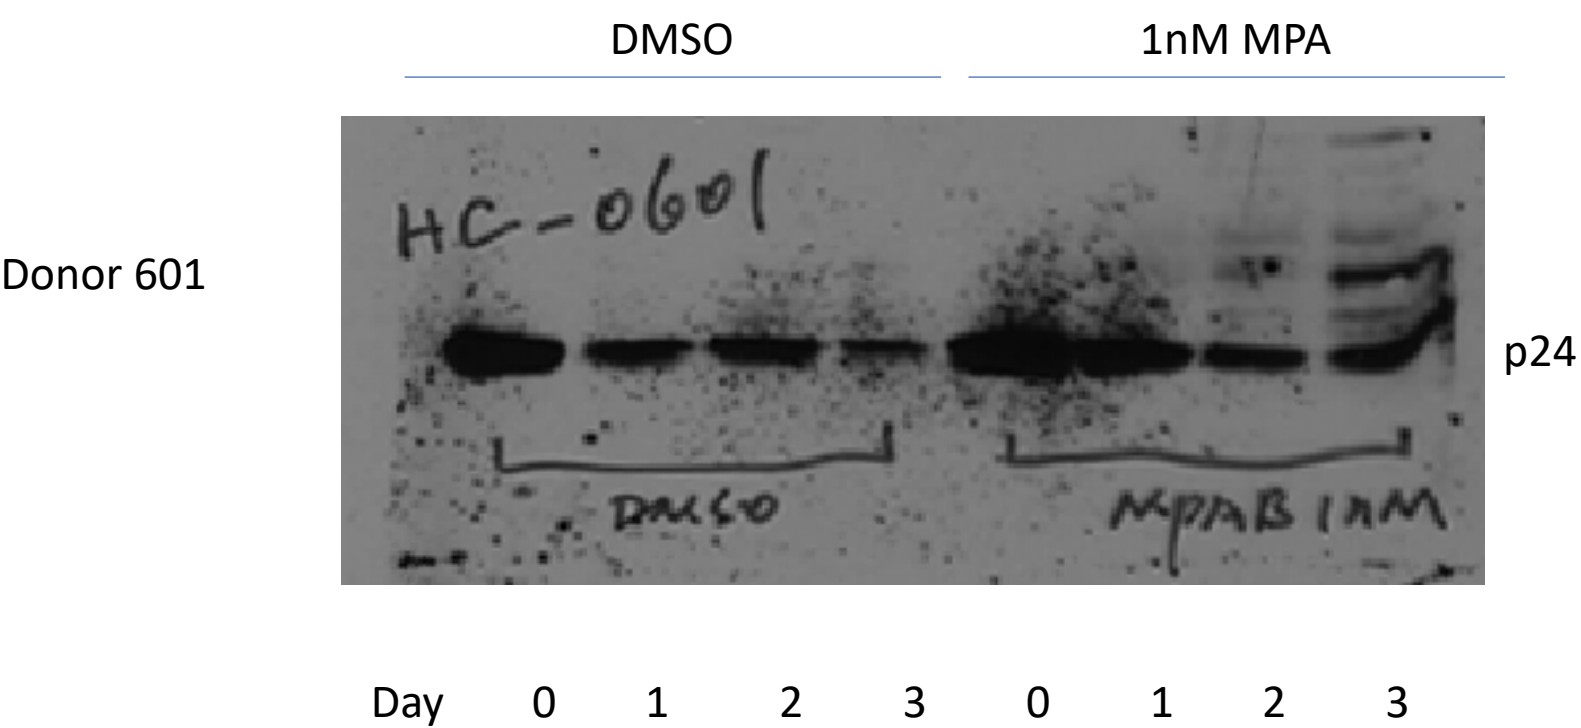

Fig 2B

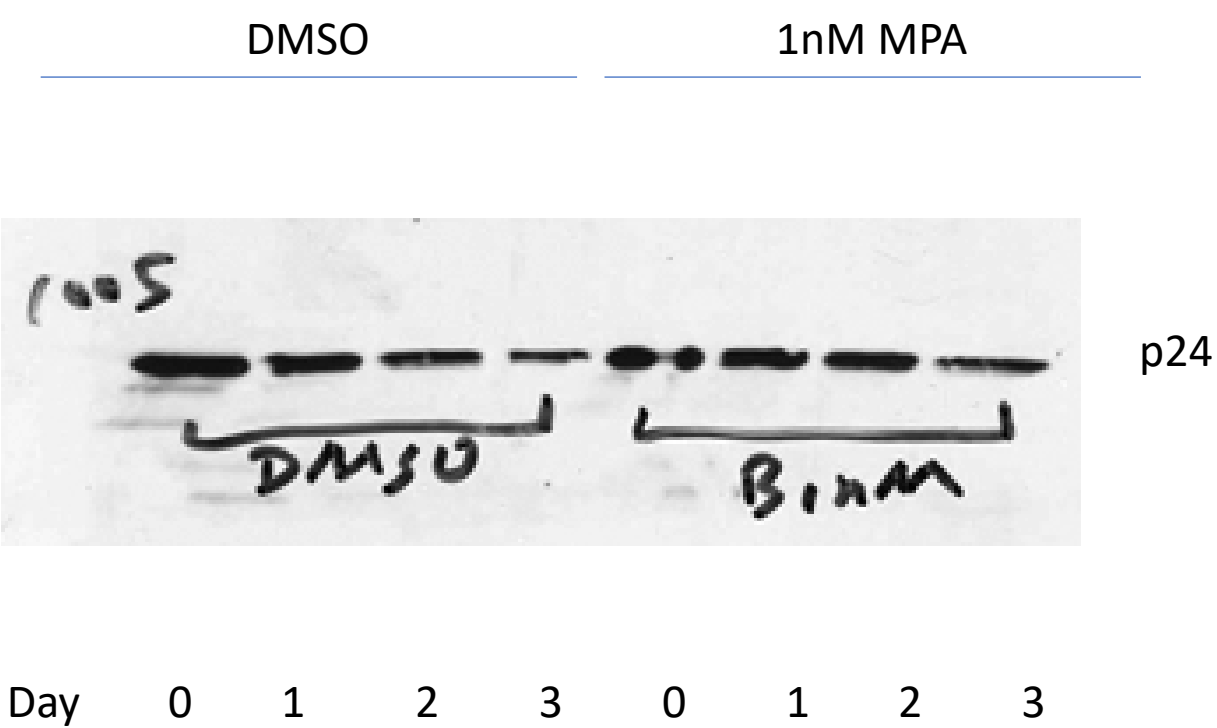

Fig 2B

DMSO

1nM MPA

Donor 0923

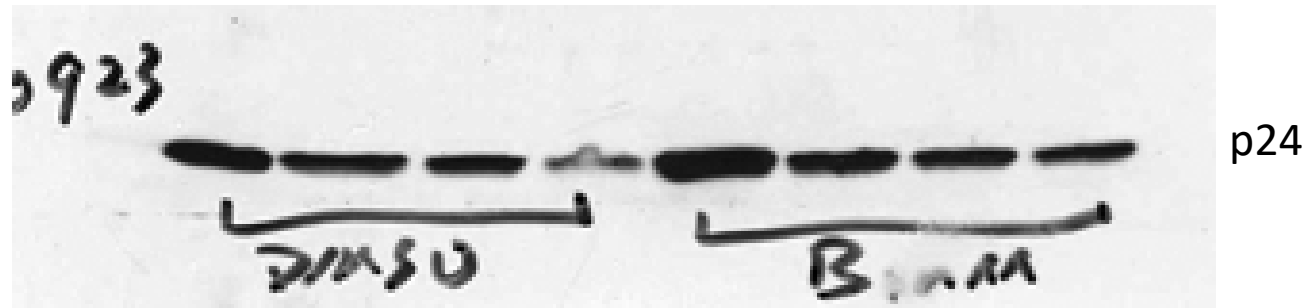

| Day | 0 | 1 | 2 | 3 | 0 | 1 | 2 | 3 |
|-----|---|---|---|---|---|---|---|---|
|-----|---|---|---|---|---|---|---|---|

Fig 2B

Donor 1012

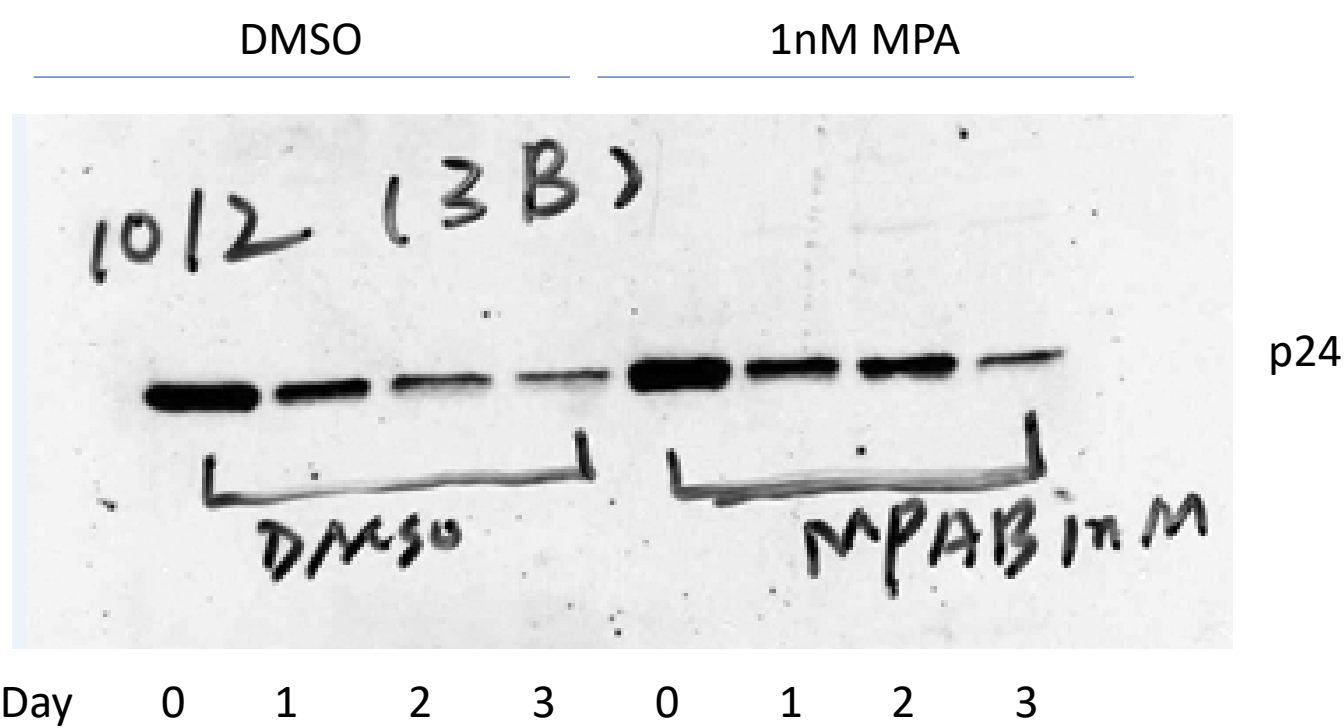



Fig 2B

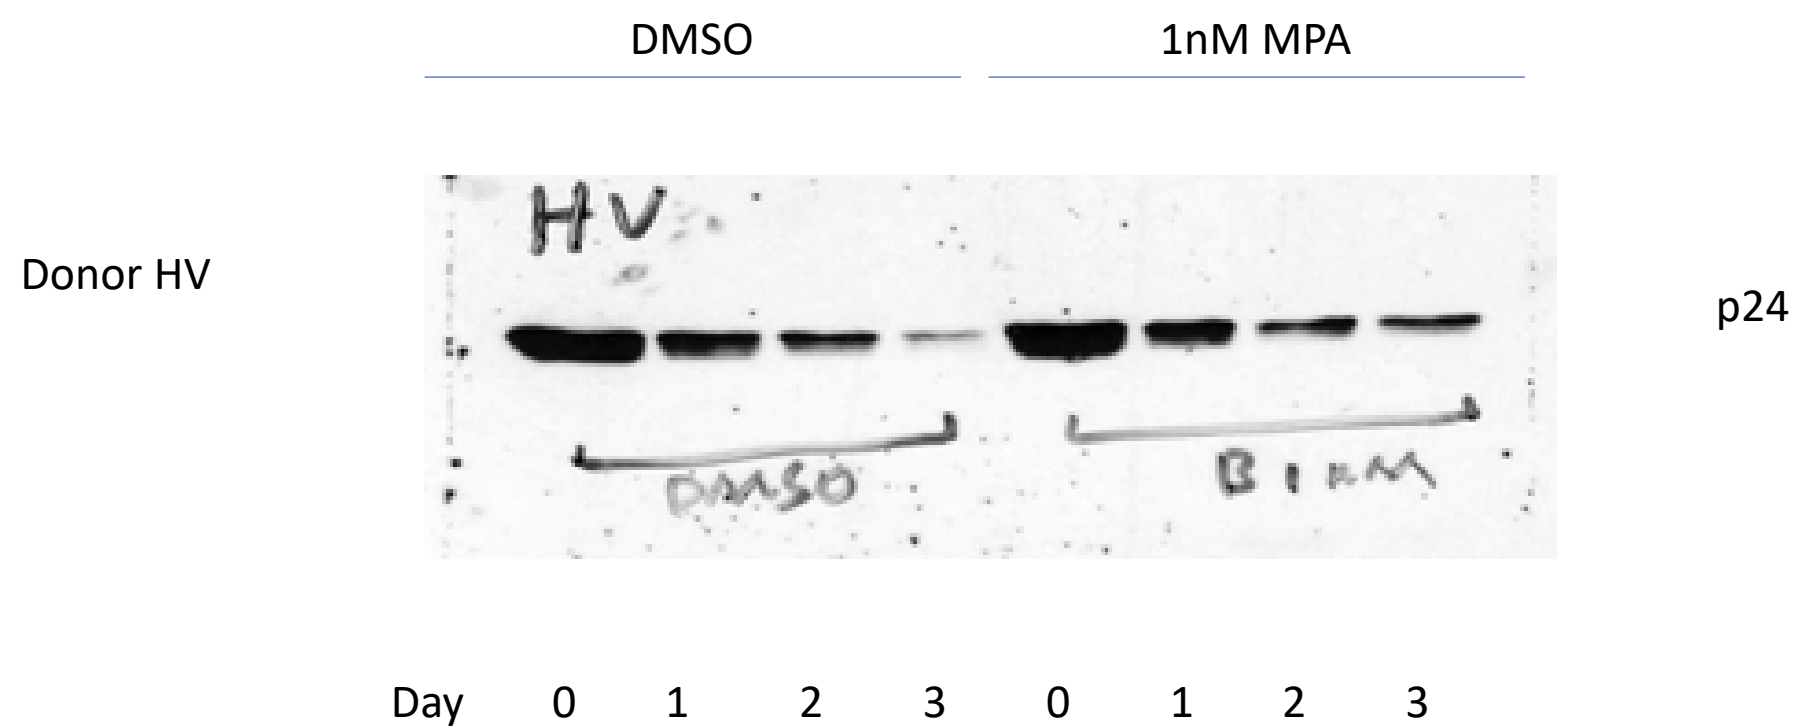

Fig 5A

1<sup>st</sup> time

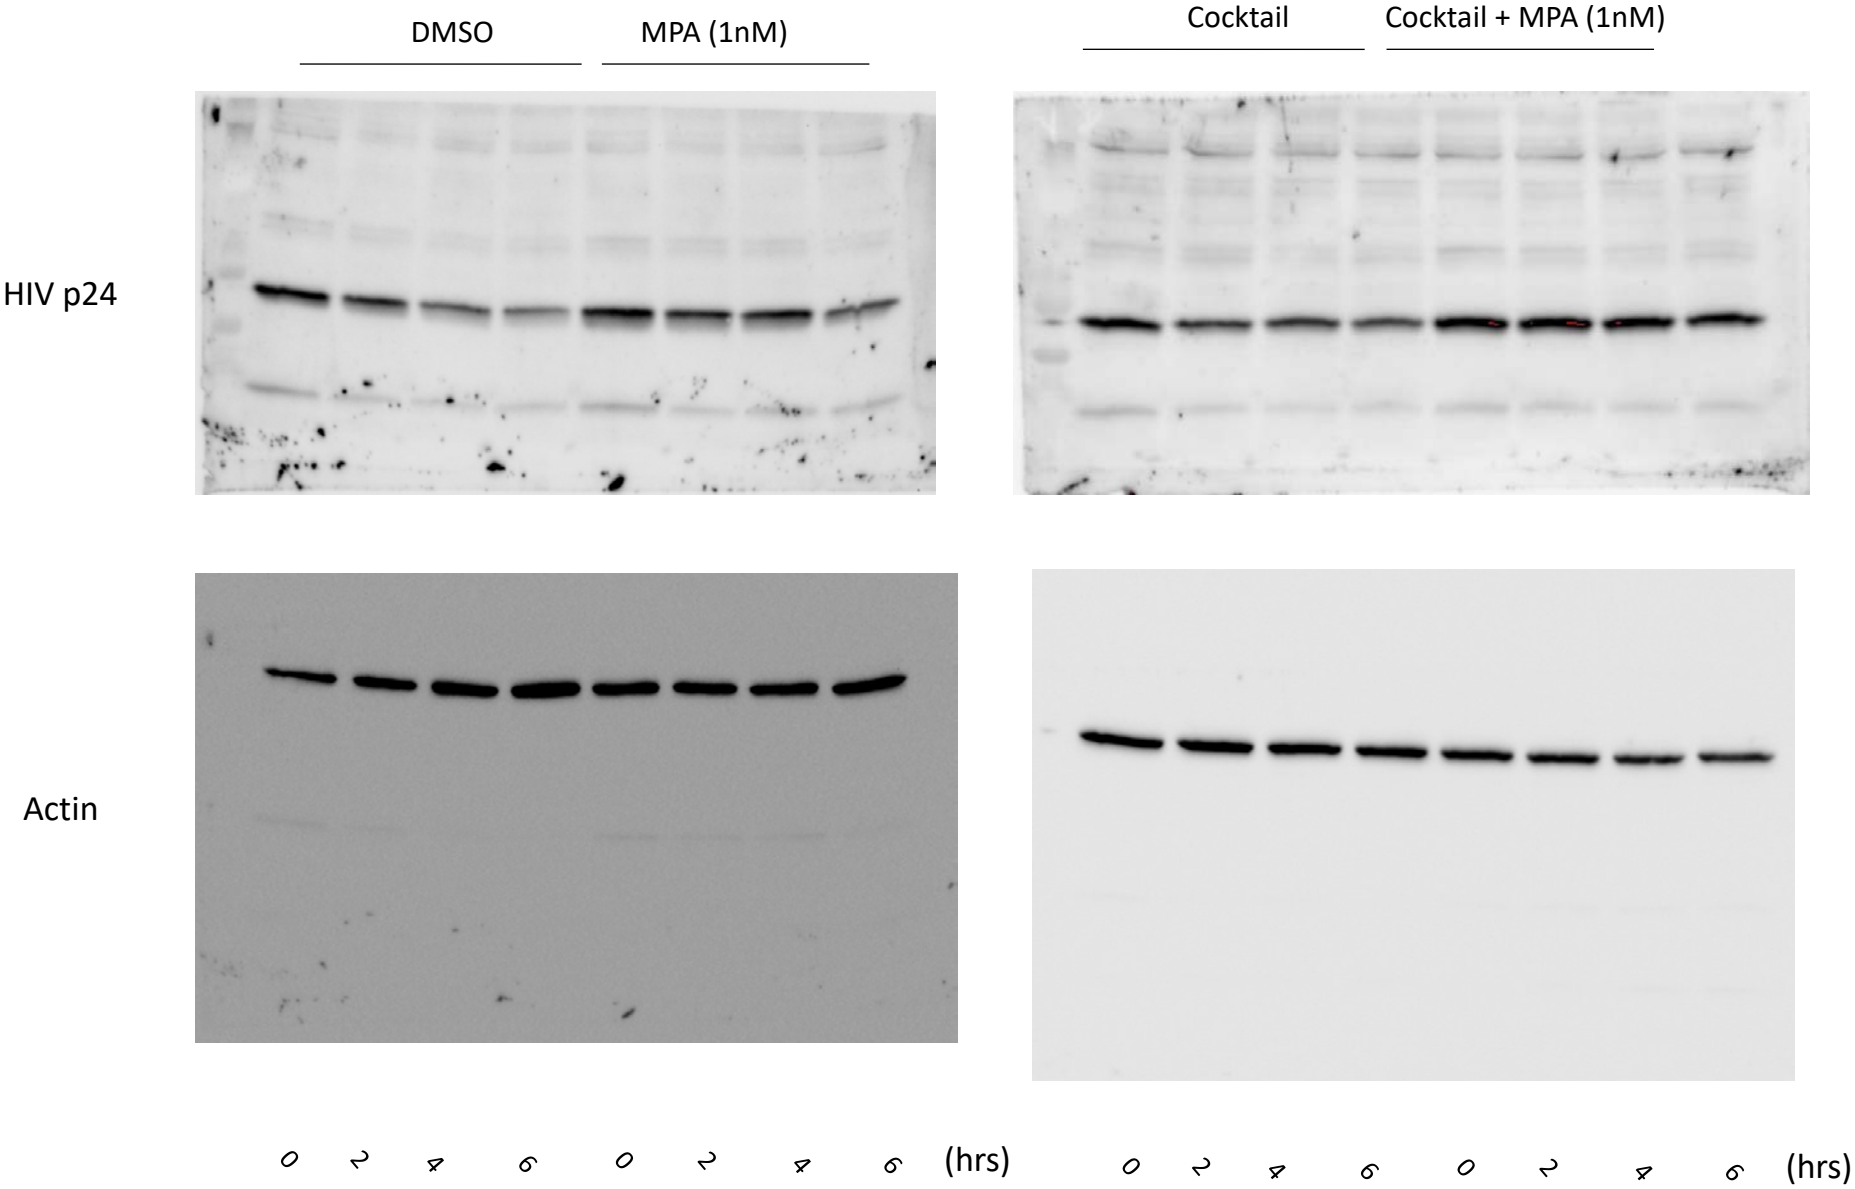

Fig 5A

2<sup>nd</sup> time

DMSO

MPA (1nM)

Cocktail

Cocktail + MPA (1nM)

HIV p24

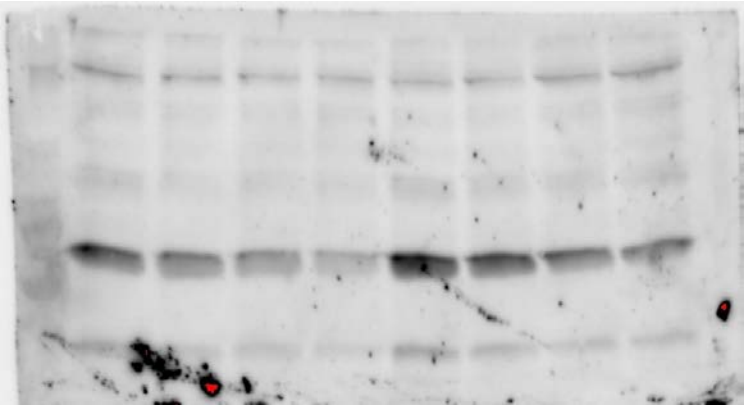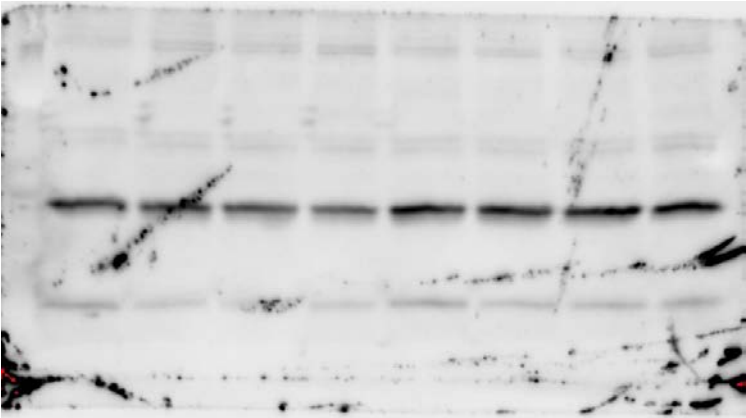

Actin

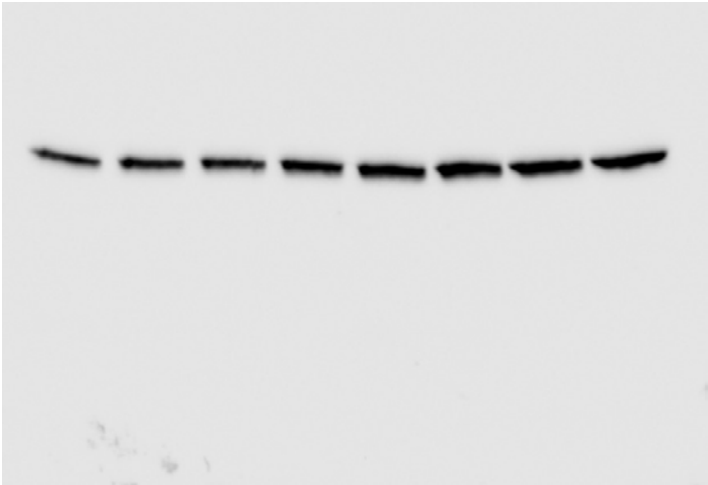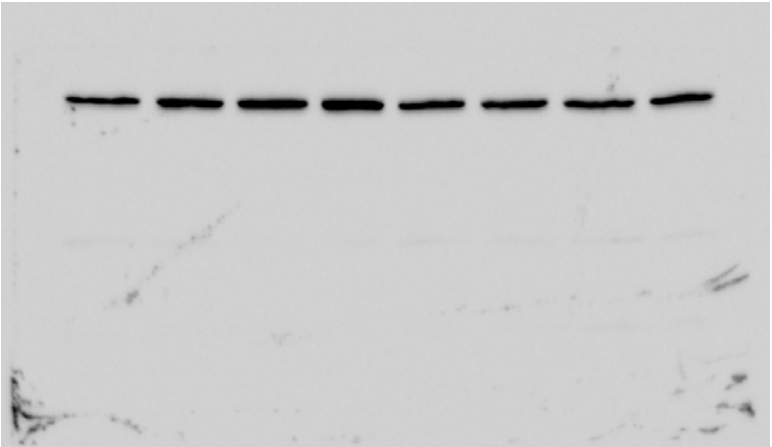

0 2 4 6 0 2 4 6 (hrs)

0 2 4 6 0 2 4 6 (hrs)

Fig 5A left panel

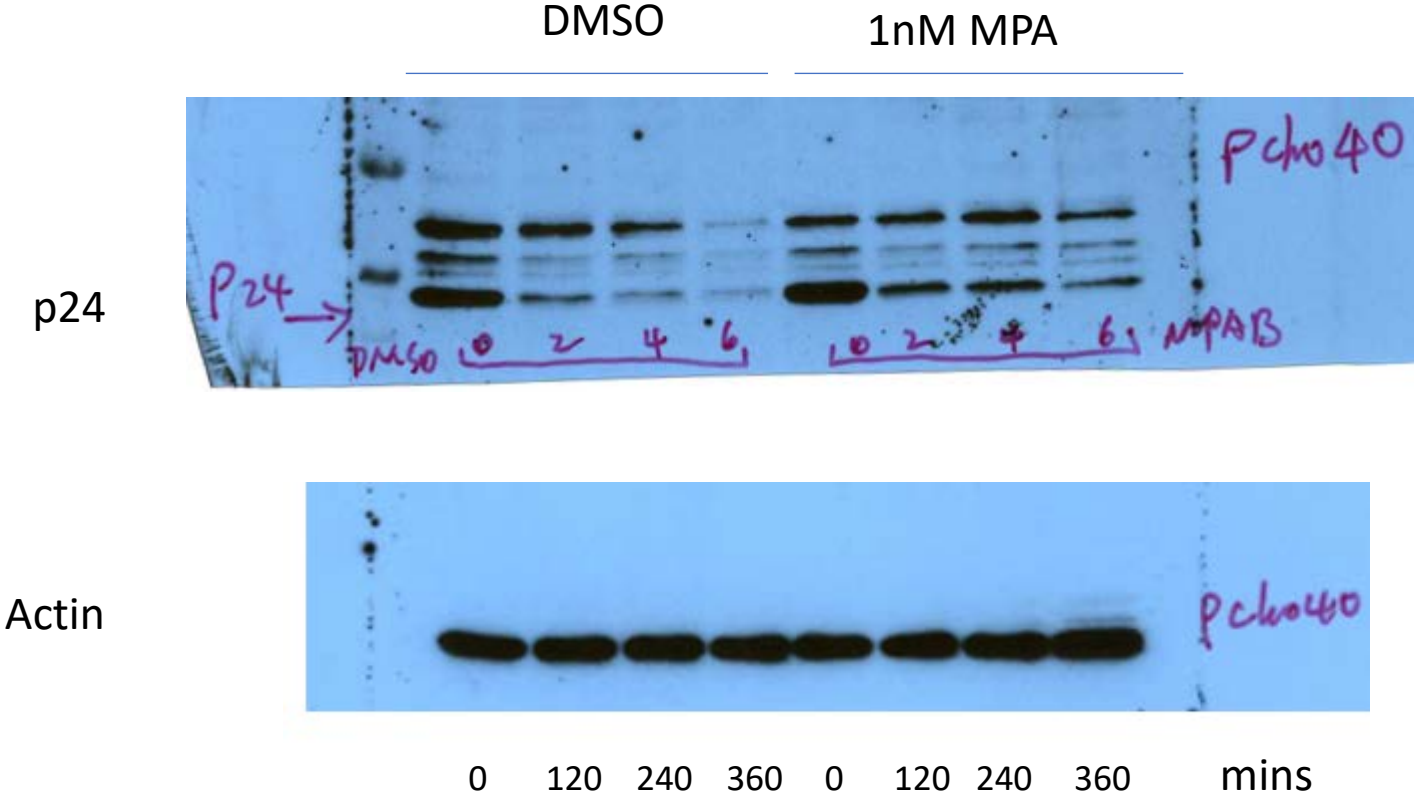

Fig S1

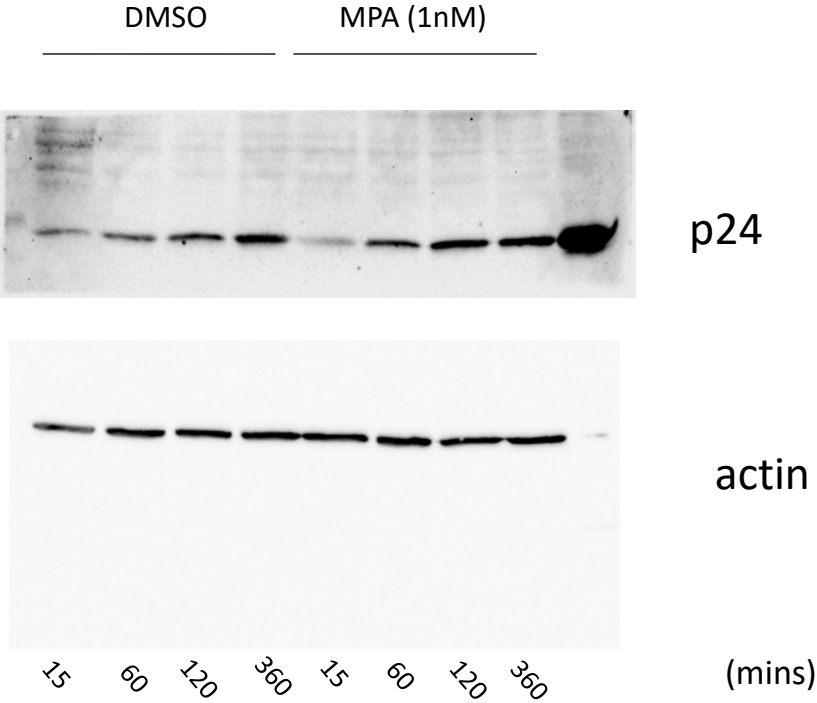

Original data for Figure 3

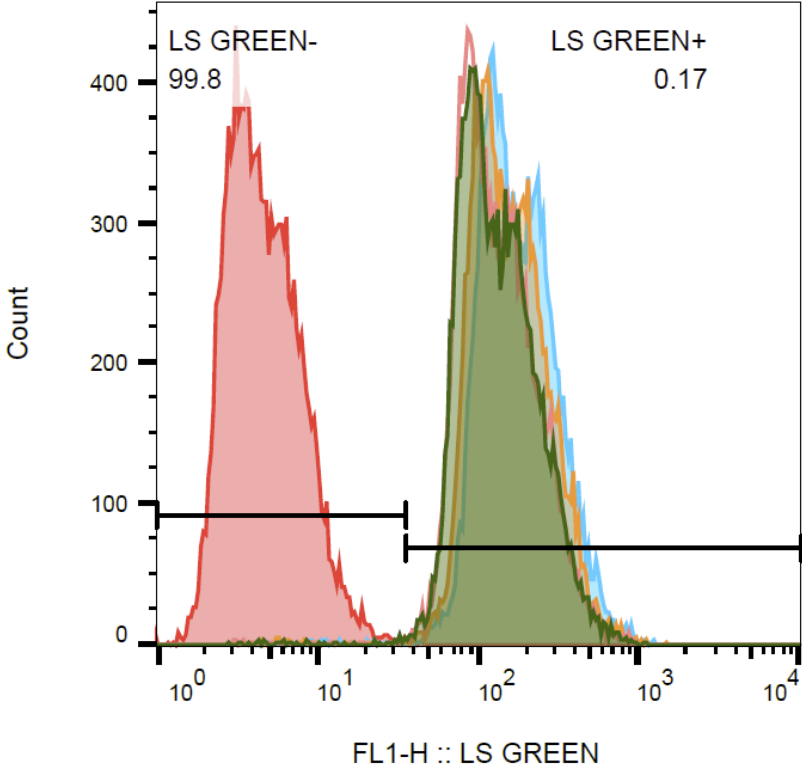

|   | Sample Name     | Subset Name | Count | Geometric Mean : FL1-H |
|---|-----------------|-------------|-------|------------------------|
| ■ | 0113 MPAB -.005 | LIVE        | 14327 | 132                    |
| □ | 0113 MPAB +.004 | LIVE        | 14504 | 131                    |
| ■ | 0113 DMSO.003   | LIVE        | 14322 | 154                    |
| ■ | 0113 UT.002     | LIVE        | 14407 | 175                    |
| ■ | 0113 US.001     | LIVE        | 14429 | 4.71                   |

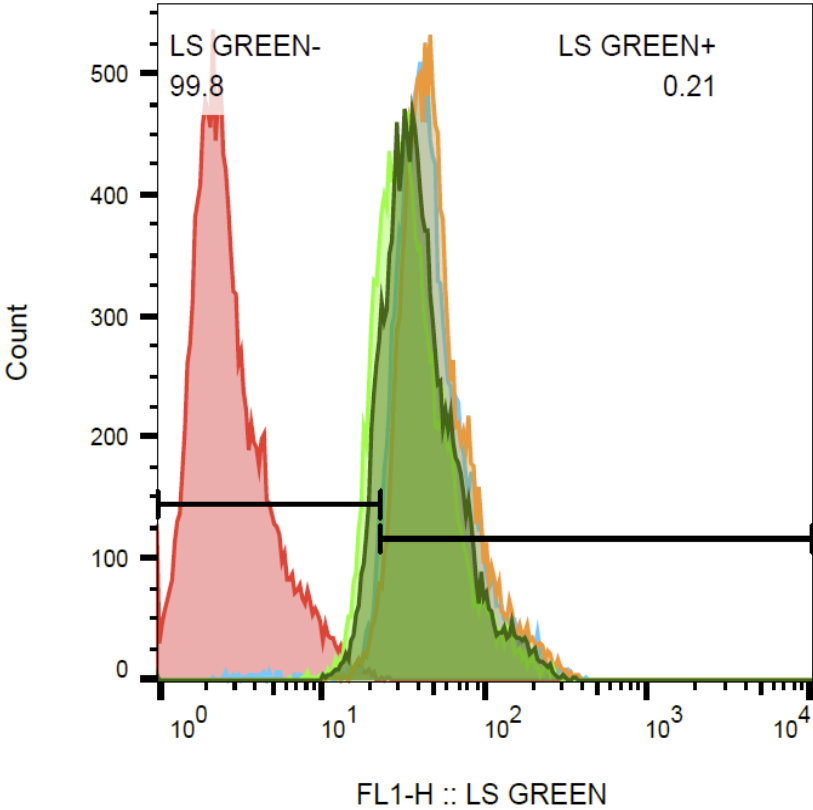

|   | Sample Name        | Subset Name | Count | Geometric Mean : FL1-H |
|---|--------------------|-------------|-------|------------------------|
| ■ | HT 0127 MPAB B.005 | LIVE        | 14809 | 40.9                   |
| ■ | HT 0127 MPAB A.004 | LIVE        | 14816 | 36.8                   |
| ■ | HT 0127 DMSO.003   | LIVE        | 14823 | 51.0                   |
| ■ | HT 0127 UT.002     | LIVE        | 14840 | 47.0                   |
| ■ | HT 0127.001        | LIVE        | 14747 | 2.82                   |

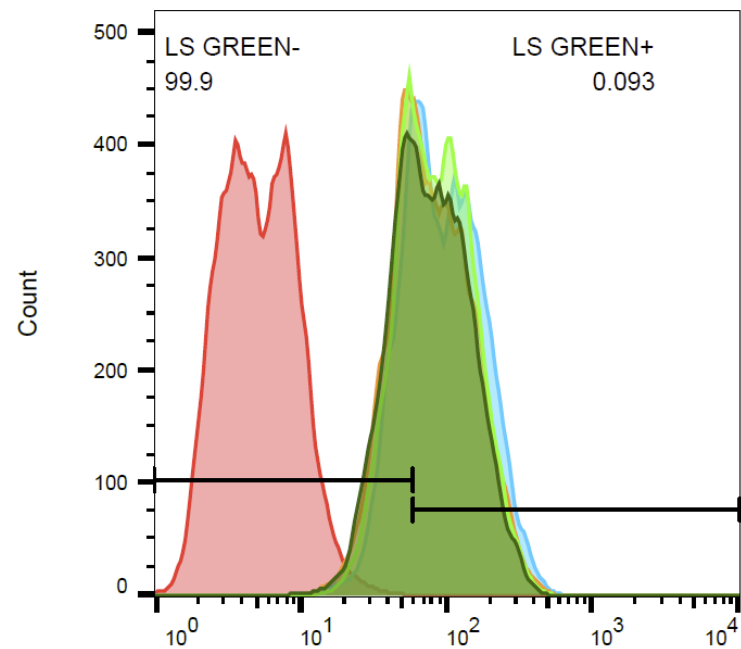

|  | Sample Name       | Subset Name | Count | Geometric Mean : FL1-H |
|--|-------------------|-------------|-------|------------------------|
|  | HT0202 mpab b.005 | LIVE        | 19001 | 77.2                   |
|  | HT0202 mpab a.004 | LIVE        | 19693 | 84.4                   |
|  | HT0202 dms0.003   | LIVE        | 19568 | 79.9                   |
|  | HT0202 ut.002     | LIVE        | 19704 | 93.4                   |
|  | HT0202.001        | LIVE        | 19343 | 5.27                   |

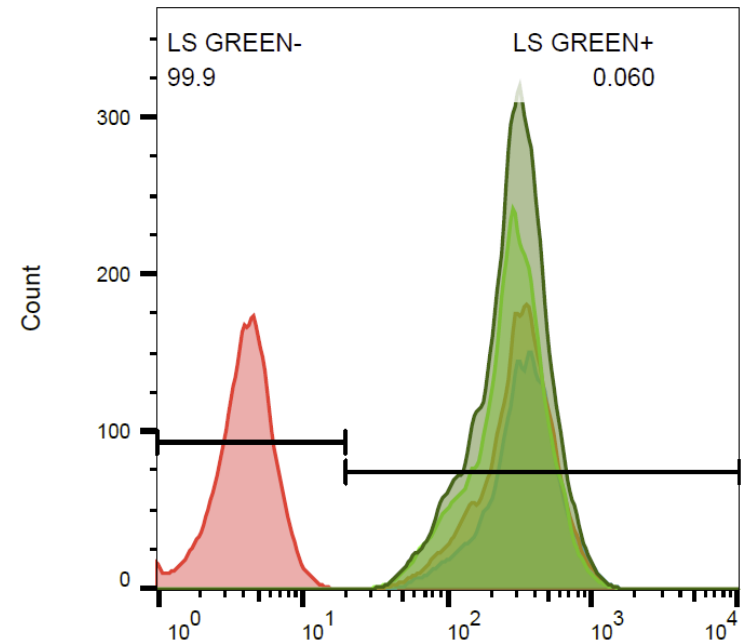

|  | Sample Name          | Subset Name | Count | Geometric Mean : FL1-H |
|--|----------------------|-------------|-------|------------------------|
|  | HT0202 #2 MPAB b.005 | LIVE        | 10804 | 274                    |
|  | HT0202 #2 MPAB a.004 | LIVE        | 8077  | 261                    |
|  | HT0202 #2 DMSO.003   | LIVE        | 6247  | 298                    |
|  | HT0202 #2 UT.002     | LIVE        | 5156  | 324                    |
|  | HT0202 #2 US.001     | LIVE        | 5029  | 4.09                   |

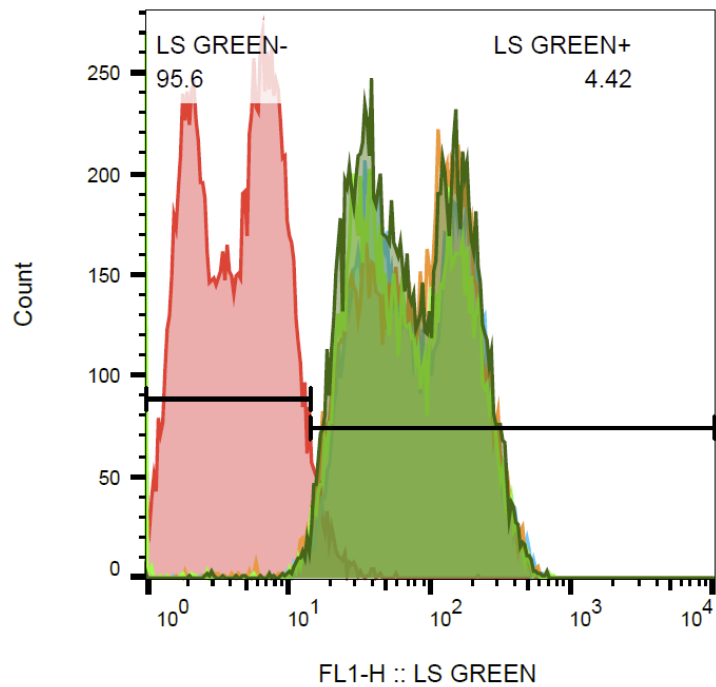

|   | Sample Name        | Subset Name | Count | Geometric Mean : FL1-H |
|---|--------------------|-------------|-------|------------------------|
| ■ | HT 0203 MPAB a.004 | LIVE        | 14529 | 72.2                   |
| ■ | HT 0203 MPAB b.005 | LIVE        | 12678 | 54.3                   |
| ■ | HT 0203 DMSO.003   | LIVE        | 12834 | 77.7                   |
| ■ | HT 0203 UT.002     | LIVE        | 12039 | 78.3                   |
| ■ | HT 0203 US.001     | LIVE        | 13739 | 4.40                   |

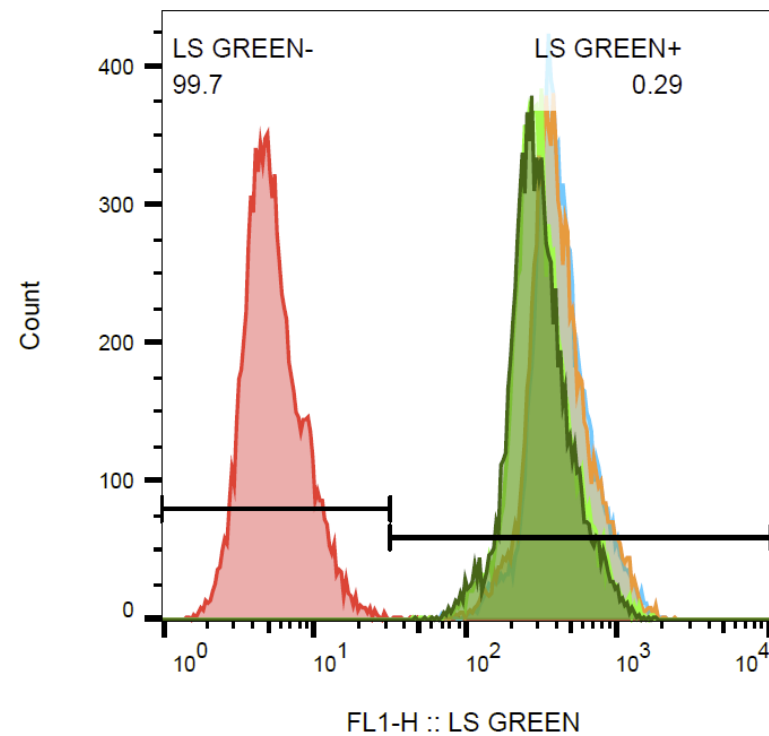

|   | Sample Name         | Subset Name | Count | Geometric Mean : FL1-H |
|---|---------------------|-------------|-------|------------------------|
| ■ | HT0208#1 MPAB b.005 | LIVE        | 9773  | 305                    |
| ■ | HT0208#1 MPAB a.004 | LIVE        | 9797  | 318                    |
| ■ | HT0208#1 DMSO.003   | LIVE        | 9756  | 407                    |
| ■ | HT0208#1 UT.002     | LIVE        | 9796  | 418                    |
| ■ | HT0208#1 US.001     | LIVE        | 9697  | 5.58                   |



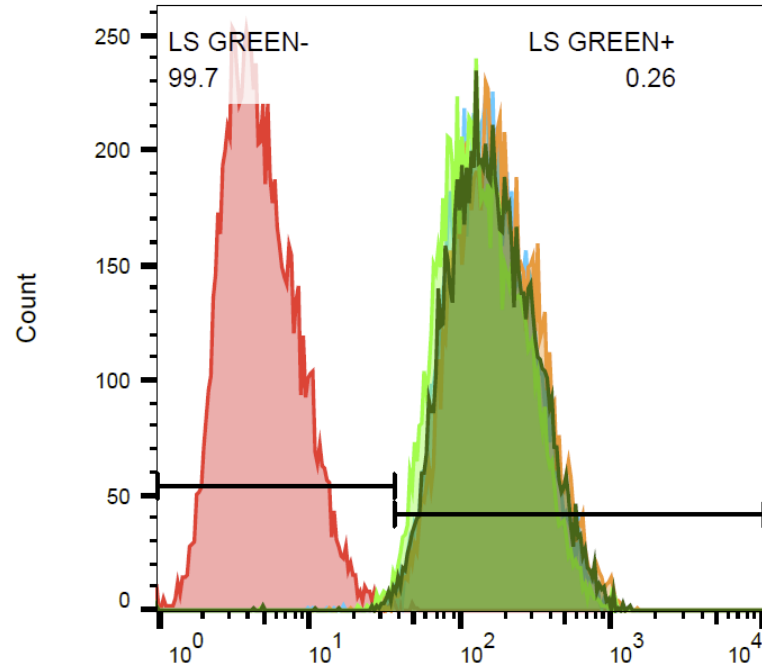

|   | Sample Name       | Subset Name | Count | Geometric Mean : FL1-H |
|---|-------------------|-------------|-------|------------------------|
| ■ | HT0304 MPAB -.005 | LIVE        | 9824  | 161                    |
| ■ | HT0304 MPAB +.004 | LIVE        | 9841  | 139                    |
| ■ | HT0304 DMSO.003   | LIVE        | 9881  | 175                    |
| ■ | HT0304 UT.002     | LIVE        | 9876  | 158                    |
| ■ | HT0304 US.001     | LIVE        | 9646  | 4.86                   |

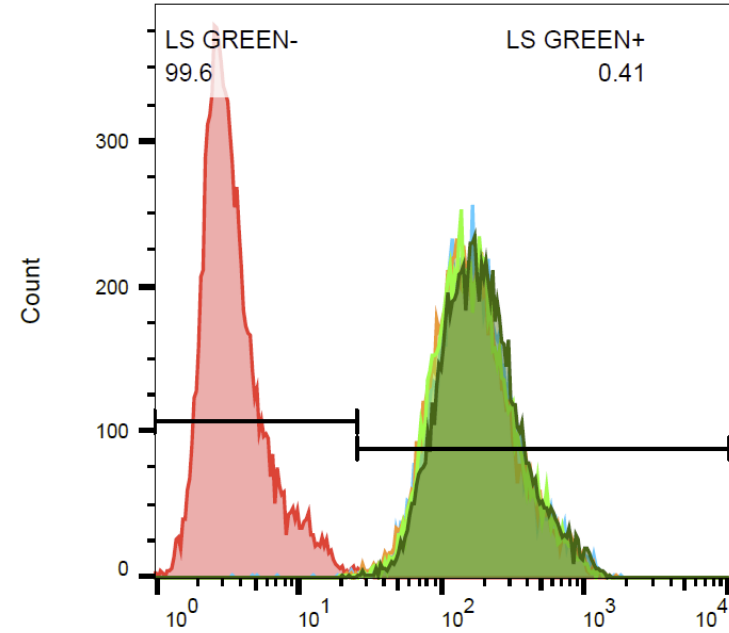

|   | Sample Name           | Subset Name | Count | Geometric Mean : FL1-H |
|---|-----------------------|-------------|-------|------------------------|
| ■ | HT0306 #1 MPA B b.005 | LIVE        | 9808  | 186                    |
| ■ | HT0306 #1 MPA B a.004 | LIVE        | 9840  | 170                    |
| ■ | HT0306 #1 DMSO.003    | LIVE        | 9823  | 166                    |
| ■ | HT0306 #1 UT.002      | LIVE        | 9829  | 172                    |
| ■ | HT0306 #1 US.001      | LIVE        | 9811  | 3.64                   |

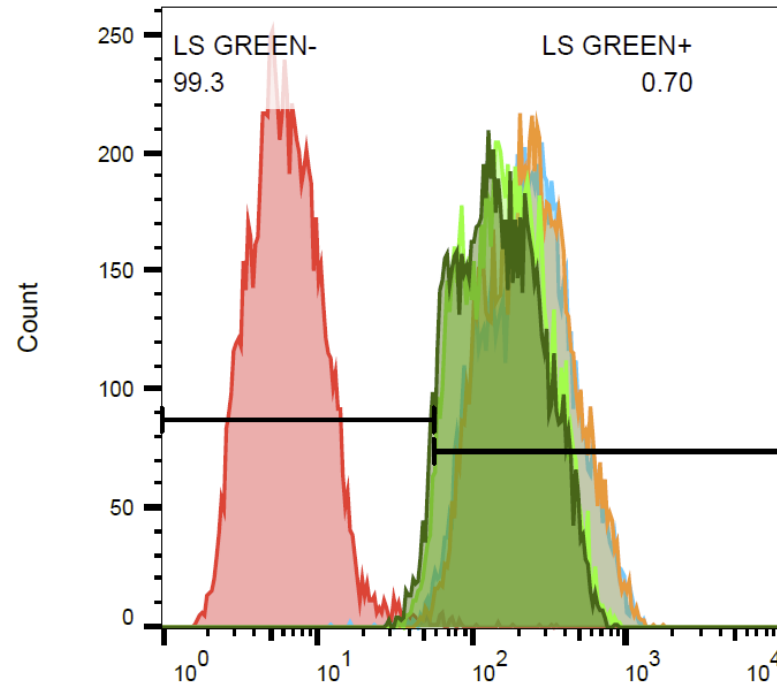

|  | Sample Name       | Subset Name | Count | Geometric Mean : FL1-H |
|--|-------------------|-------------|-------|------------------------|
|  | HT0322 MPAB -.010 | LIVE        | 9554  | 149                    |
|  | HT0322 MPAB +.009 | LIVE        | 9583  | 162                    |
|  | HT0322 DMSO.008   | LIVE        | 9492  | 233                    |
|  | HT0322 UT.007     | LIVE        | 9227  | 226                    |
|  | HT0322 US.006     | LIVE        | 9265  | 6.54                   |

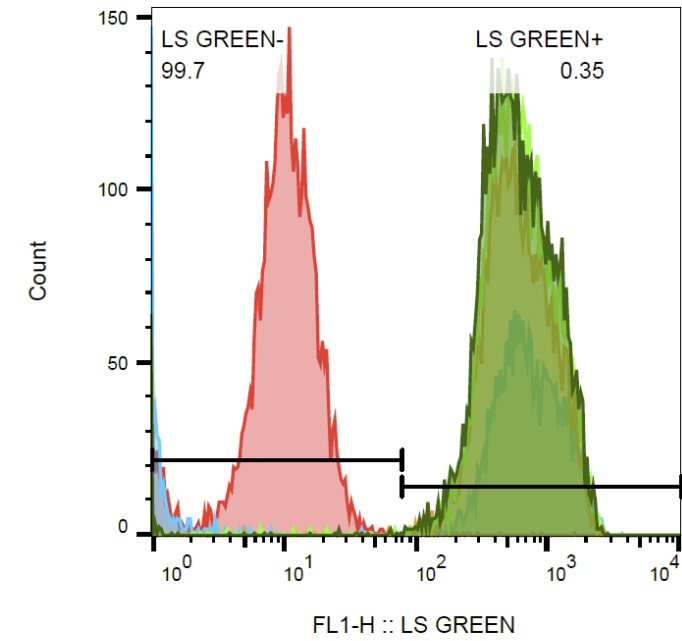

|  | Sample Name   | Subset Name | Count | Geometric Mean : FL1-H |
|--|---------------|-------------|-------|------------------------|
|  | 0330 MPA-.005 | LIVE        | 5833  | 541                    |
|  | 0330 MPA+.004 | LIVE        | 5379  | 596                    |
|  | 0330 DMSO.003 | LIVE        | 4450  | 588                    |
|  | 0330 UT.002   | LIVE        | 4045  | 50.0                   |
|  | 0330 US.001   | LIVE        | 5733  | 5.99                   |

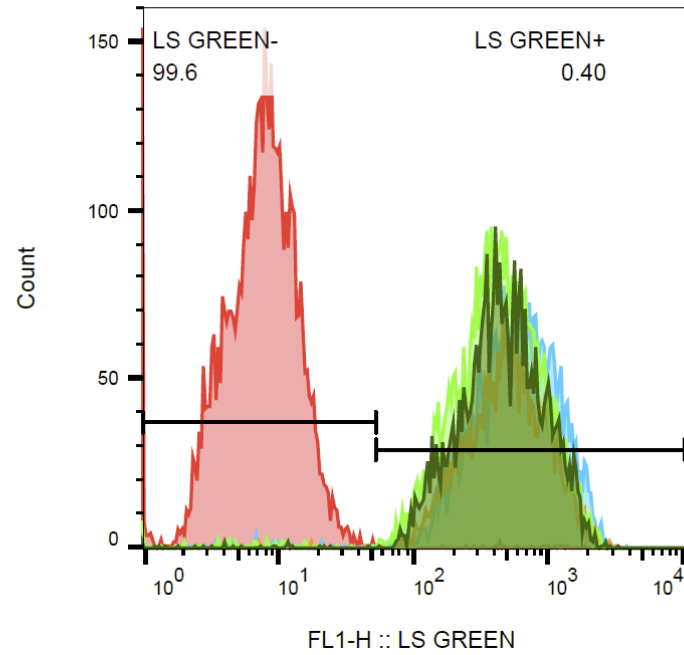

|  | Sample Name    | Subset Name | Count | Geometric Mean : FL1-H |
|--|----------------|-------------|-------|------------------------|
|  | 0406 MPAB-.010 | LIVE        | 3688  | 438                    |
|  | 0406 MPAB+.009 | LIVE        | 4471  | 398                    |
|  | 0406 DMSO.008  | LIVE        | 2778  | 474                    |
|  | 0406 UT.007    | LIVE        | 3562  | 551                    |
|  | 0406 US.006    | LIVE        | 5470  | 7.07                   |

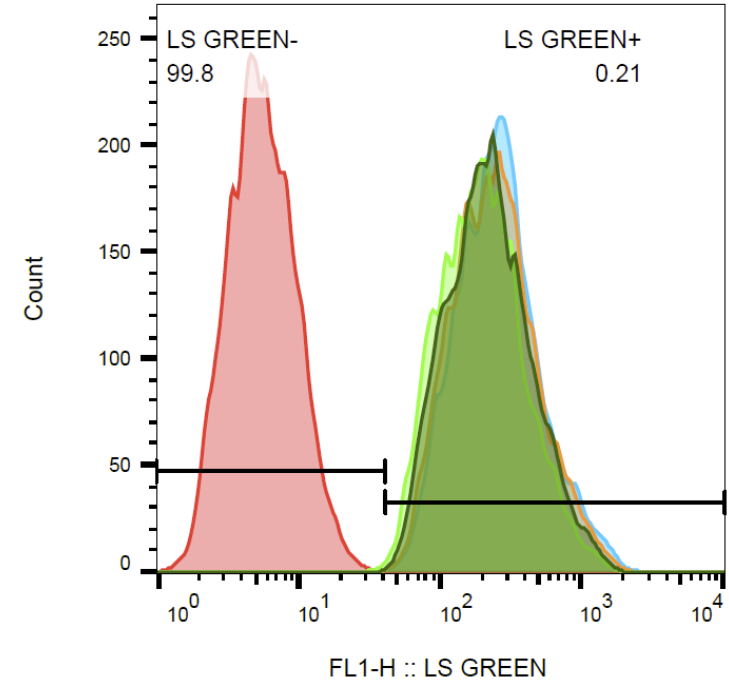

|  | Sample Name    | Subset Name | Count | Geometric Mean : FL1-H |
|--|----------------|-------------|-------|------------------------|
|  | 0601 MPAB-.005 | LIVE        | 9507  | 220                    |
|  | 0601 MPAB+.004 | LIVE        | 9489  | 197                    |
|  | 0601 DMSO.003  | LIVE        | 9426  | 241                    |
|  | 0601 UT.002    | LIVE        | 9514  | 256                    |
|  | 0601 US.001    | LIVE        | 9459  | 5.67                   |

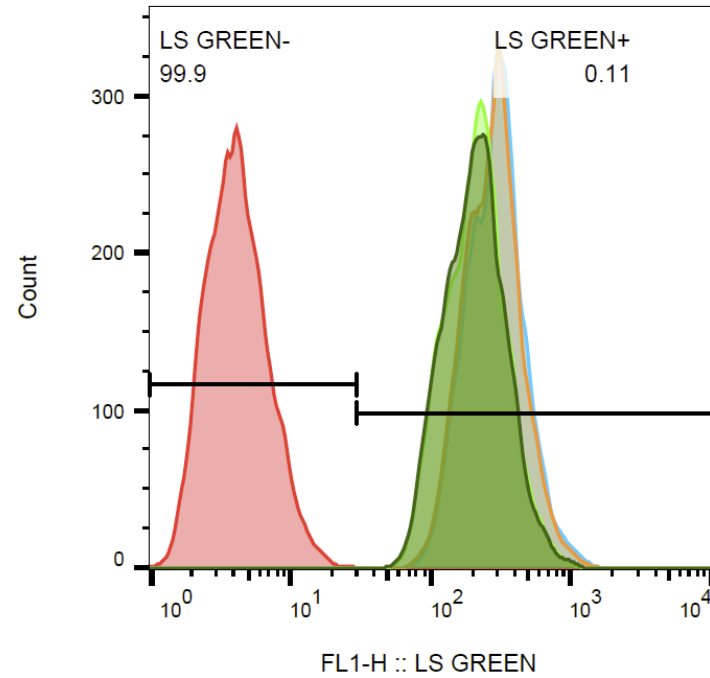

|   | Sample Name       | Subset Name | Count | Geometric Mean : FL1-H |
|---|-------------------|-------------|-------|------------------------|
| ■ | HT0817 MPAB -.005 | LIVE        | 9801  | 207                    |
| ■ | HT0817 MPAB +.004 | LIVE        | 9827  | 210                    |
| ■ | HT0817 DMSO.003   | LIVE        | 9798  | 278                    |
| ■ | HT0817 UT.002     | LIVE        | 9843  | 288                    |
| ■ | HT0817 US.001     | LIVE        | 9688  | 4.25                   |

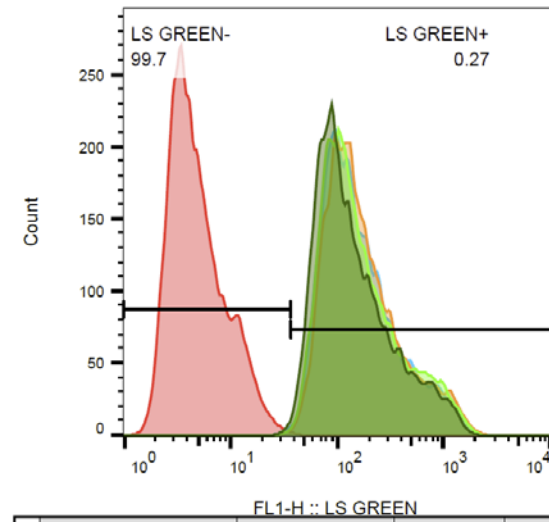

|   | Sample Name            | Subset Name | Count | Geometric Mean : FL1-H |
|---|------------------------|-------------|-------|------------------------|
| ■ | HT 1025 MPAB 1NM -.005 | LIVE        | 9672  | 145                    |
| ■ | HT 1025 MPAB 1NM +.004 | LIVE        | 9611  | 164                    |
| ■ | HT 1025 DMSO.003       | LIVE        | 9490  | 172                    |
| ■ | HT 1025 UT.002         | LIVE        | 9580  | 162                    |
| ■ | HT 1025 US.001         | LIVE        | 9329  | 5.03                   |

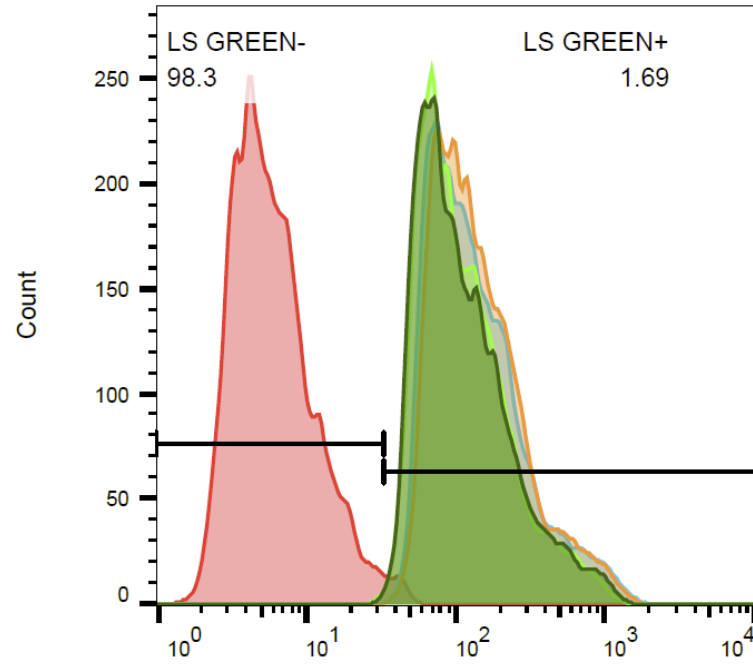

|  | Sample Name      | Subset Name | Count | Geometric Mean : FL1-H |
|--|------------------|-------------|-------|------------------------|
|  | 1109 mpab 1-.005 | LIVE        | 9718  | 113                    |
|  | 1109 mpab 1+.004 | LIVE        | 9702  | 113                    |
|  | 1109 dmso.003    | LIVE        | 9728  | 143                    |
|  | 1109 ut.002      | LIVE        | 9736  | 136                    |
|  | 1109 us.001      | LIVE        | 9650  | 6.15                   |

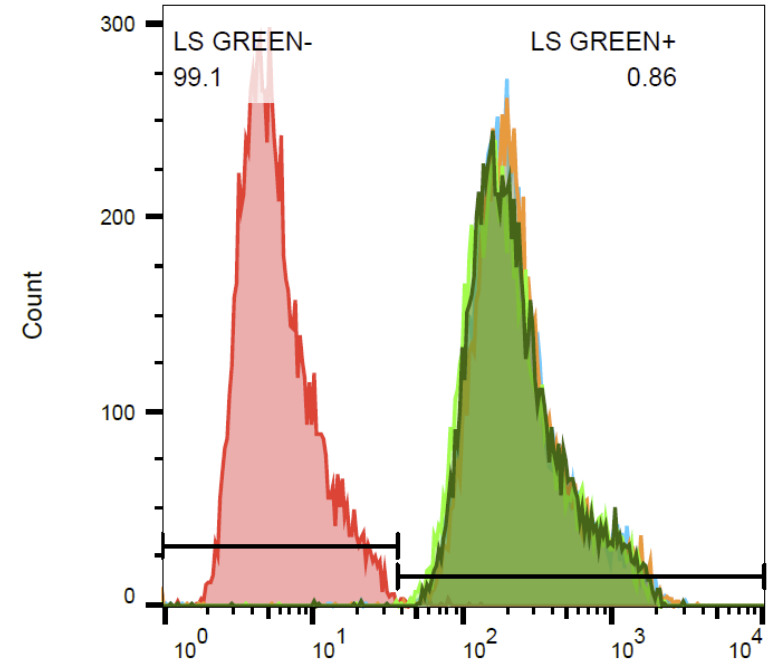

|  | Sample Name      | Subset Name | Count | Geometric Mean : FL1-H |
|--|------------------|-------------|-------|------------------------|
|  | 1110 mpab 1-.010 | LIVE        | 9547  | 227                    |
|  | 1110 mpab 1+.009 | LIVE        | 9486  | 214                    |
|  | 1110 dmso.008    | LIVE        | 9500  | 235                    |
|  | 1110 ut.007      | LIVE        | 9614  | 227                    |
|  | 1110 us.006      | LIVE        | 9512  | 6.04                   |

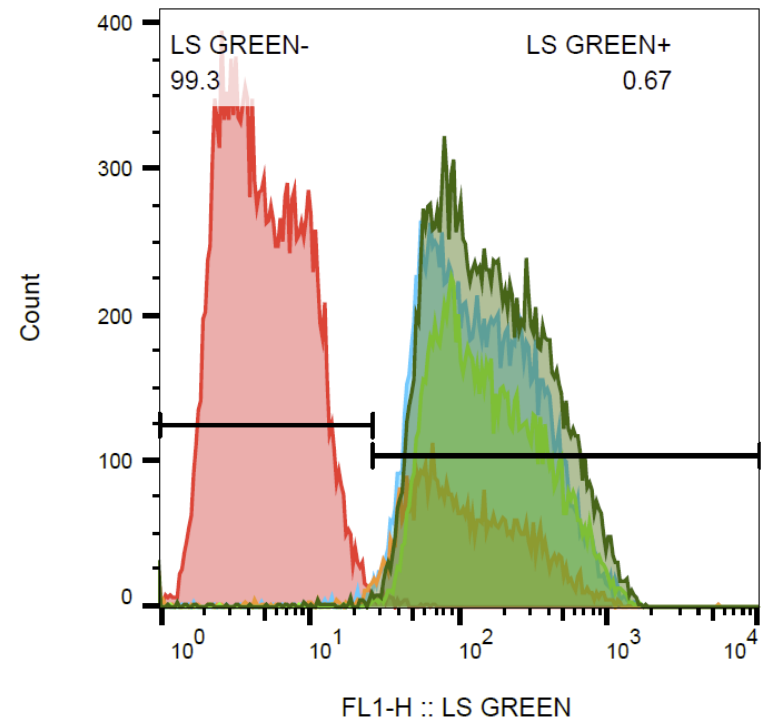

|  | Sample Name     | Subset Name | Count | Geometric Mean : FL1-H |
|--|-----------------|-------------|-------|------------------------|
|  | 1122 mpab -.004 | LIVE        | 18351 | 158                    |
|  | 1122 mpab +.003 | LIVE        | 11589 | 157                    |
|  | 1122 dms0.005   | LIVE        | 5525  | 105                    |
|  | 1122 ut.002     | LIVE        | 15502 | 137                    |
|  | 1122 us.001     | LIVE        | 17914 | 5.05                   |

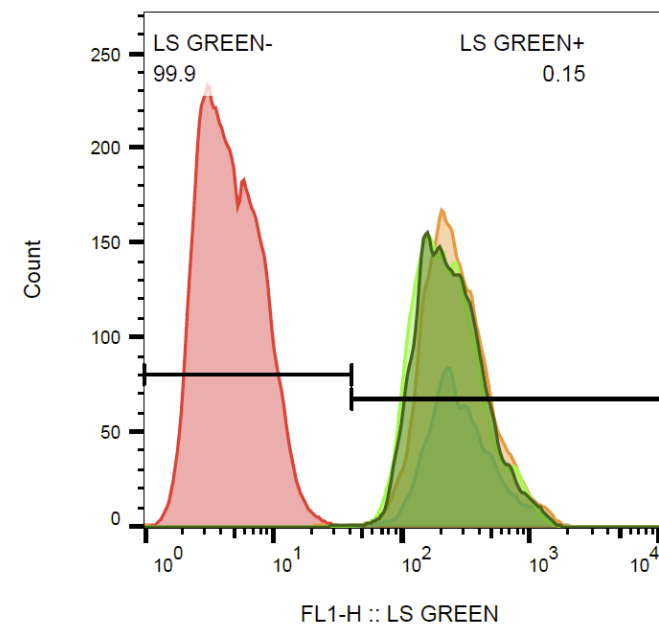

|  | Sample Name     | Subset Name | Count | Geometric Mean : FL1-H |
|--|-----------------|-------------|-------|------------------------|
|  | 1123 MPAB -.010 | LIVE        | 6599  | 233                    |
|  | 1123 MPAB +.009 | LIVE        | 6661  | 226                    |
|  | 1123 DMSO.008   | LIVE        | 6502  | 256                    |
|  | 1123 UT.007     | LIVE        | 3072  | 264                    |
|  | 1123 US.006     | LIVE        | 9513  | 4.79                   |

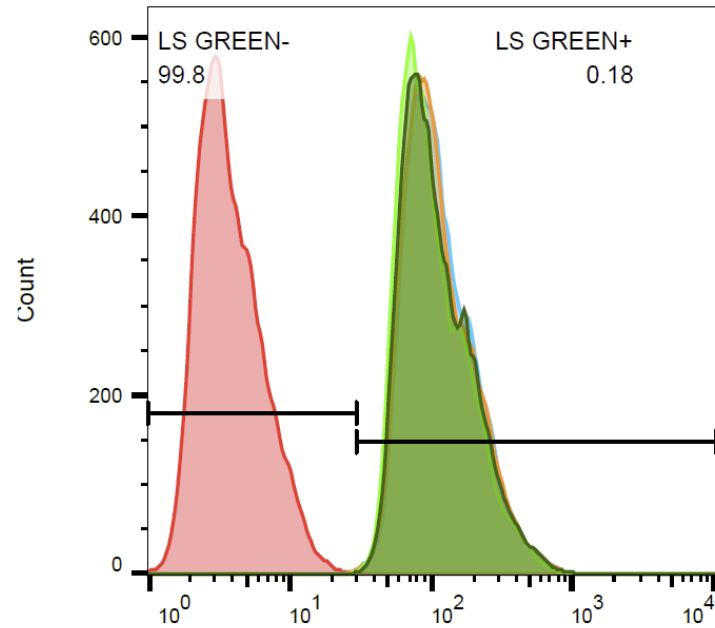

FL1-H :: LS GREEN

|  | Sample Name        | Subset Name | Count | Geometric Mean : FL1-H |
|--|--------------------|-------------|-------|------------------------|
|  | 1130 #1 mpab -.005 | LIVE        | 19672 | 111                    |
|  | 1130 #1 mpab +.004 | LIVE        | 19754 | 104                    |
|  | 1130 #1 dmso.003   | LIVE        | 19661 | 114                    |
|  | 1130 #1 ut.002     | LIVE        | 19744 | 116                    |
|  | 1130 #1 us.001     | LIVE        | 19549 | 3.89                   |

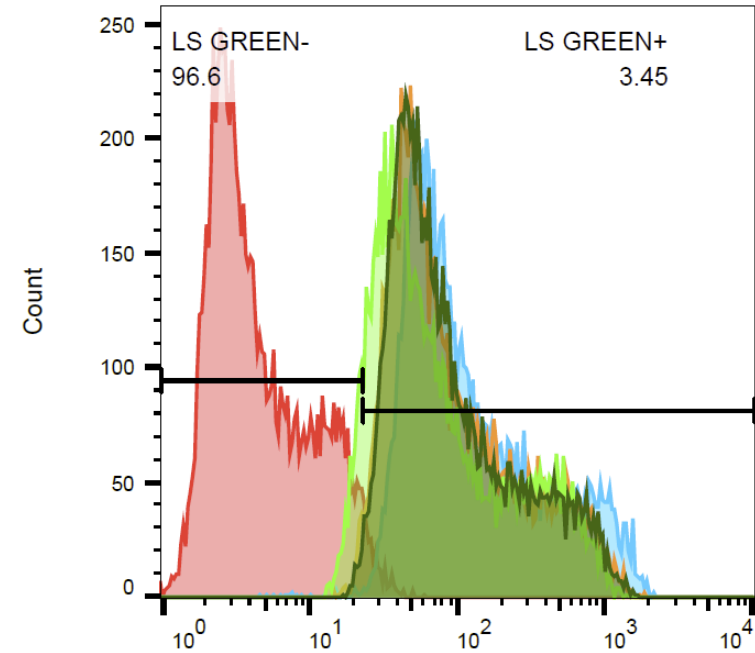

FL1-H :: LS GREEN

|  | Sample Name        | Subset Name | Count | Geometric Mean : FL1-H |
|--|--------------------|-------------|-------|------------------------|
|  | HT1120#4 MPAB-.005 | LIVE        | 9380  | 93.7                   |
|  | HT1120#4 MPAB+.004 | LIVE        | 9295  | 76.9                   |
|  | HT1120#4 DMSO.003  | LIVE        | 9267  | 93.9                   |
|  | HT1120#4 UT.002    | LIVE        | 9103  | 127                    |
|  | HT1120#4 .001      | LIVE        | 9105  | 4.74                   |

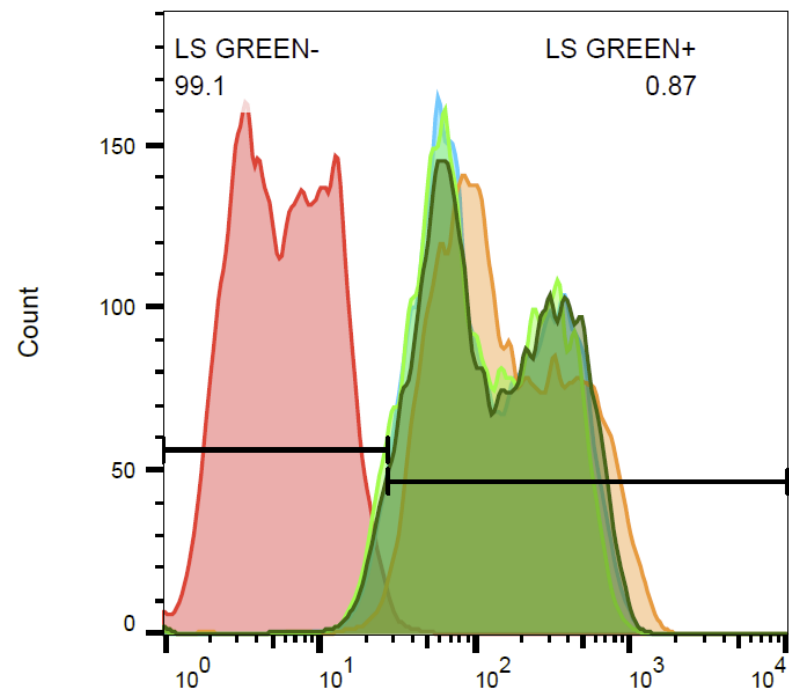

FL1-H :: LS GREEN

|   | Sample Name        | Subset Name | Count | Geometric Mean : FL1-H |
|---|--------------------|-------------|-------|------------------------|
| ■ | HT1214#3 MPAB-.010 | LIVE        | 9448  | 126                    |
| ■ | HT1214#3 MPAB+.009 | LIVE        | 9461  | 111                    |
| ■ | HT1214#3 DMSO.008  | LIVE        | 9150  | 152                    |
| ■ | HT1214#3 UT.007    | LIVE        | 9439  | 120                    |
| ■ | HT1214#3 US.006    | LIVE        | 9200  | 5.98                   |



Original data for Figure 4

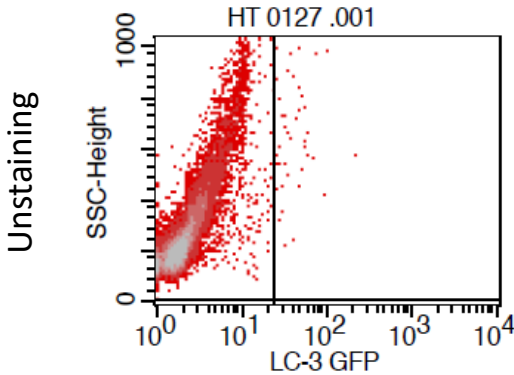

File: HT 0127 .001      Gate: G1

| Quad | % Gated | % Total | X Geo Mean |
|------|---------|---------|------------|
| UL   | 99.78   | 97.10   | 2.15       |
| UR   | 0.22    | 0.21    | 39.92      |

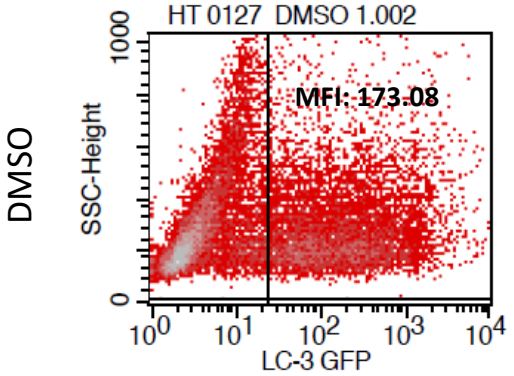

File: HT 0127 DMSO 1.002      Gate: G1

| Quad | % Gated | % Total | X Geo Mean |
|------|---------|---------|------------|
| UL   | 57.04   | 53.55   | 4.18       |
| UR   | 42.96   | 40.34   | 173.08     |

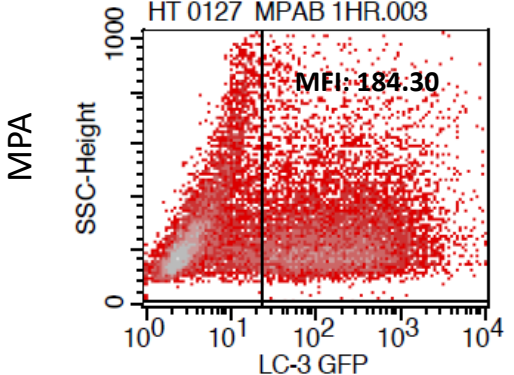

File: HT 0127 MPAB 1HR.003      Gate: G1

| Quad | % Gated | % Total | X Geo Mean |
|------|---------|---------|------------|
| UL   | 46.72   | 42.82   | 4.96       |
| UR   | 53.28   | 48.82   | 184.30     |

Unstaining

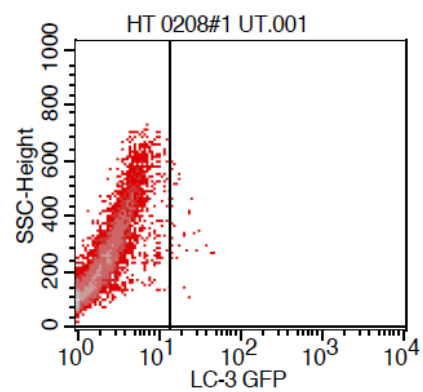

File: HT 0208#1 UT.001 Patient ID:

| Quad | % Gated | % Total | X Geo Mean |
|------|---------|---------|------------|
| UL   | 99.70   | 96.22   | 2.05       |
| UR   | 0.30    | 0.29    | 18.86      |

DMSO

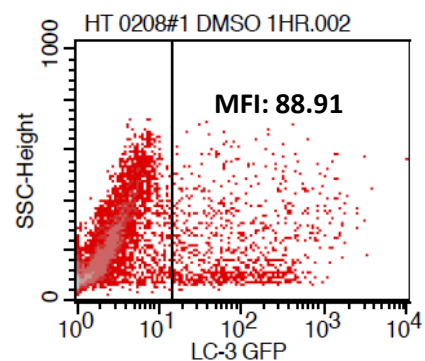

File: HT 0208#1 DMSO 1HR.002

| Quad | % Gated | % Total | X Geo Mean |
|------|---------|---------|------------|
| UL   | 90.45   | 82.81   | 2.15       |
| UR   | 9.55    | 8.74    | 88.91      |

MPA

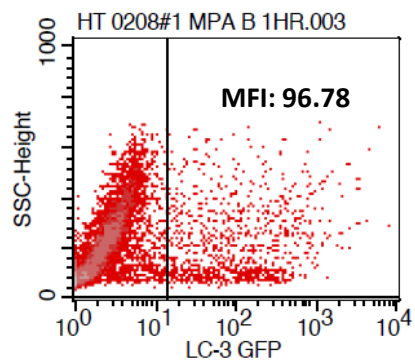

File: HT 0208#1 MPA B 1HR.003

| Quad | % Gated | % Total | X Geo Mean |
|------|---------|---------|------------|
| UL   | 89.59   | 81.59   | 2.21       |
| UR   | 10.41   | 9.48    | 96.78      |

Unstaining

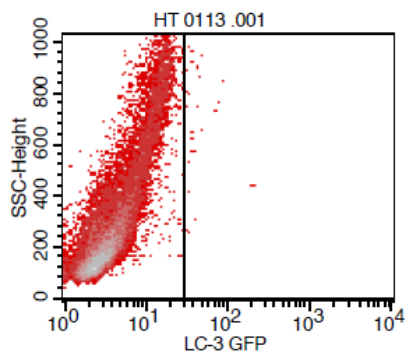

File: HT 0113 .001

| Quad | % Gated | % Total | X Geo Mean |
|------|---------|---------|------------|
| UL   | 99.83   | 91.44   | 3.77       |
| UR   | 0.17    | 0.16    | 41.19      |

DMSO

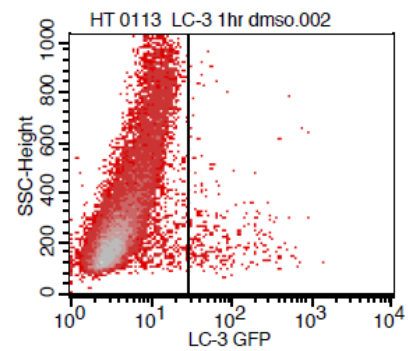

File: HT 0113 LC-3 1hr dms0.002

| Quad | % Gated | % Total | X Geo Mean |
|------|---------|---------|------------|
| UL   | 98.47   | 87.74   | 4.50       |
| UR   | 1.53    | 1.36    | 77.92      |

MPA

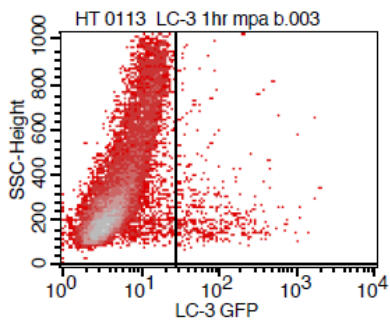

File: HT 0113 LC-3 1hr mpa b.003

| Quad | % Gated | % Total | X Geo Mean |
|------|---------|---------|------------|
| UL   | 97.63   | 85.93   | 5.01       |
| UR   | 2.37    | 2.09    | 85.14      |

Unstaining

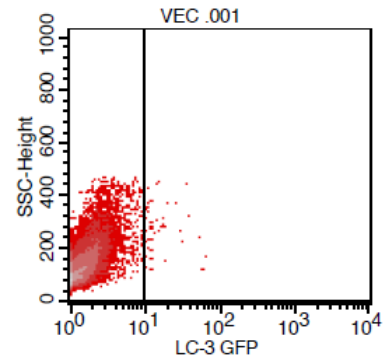

File: VEC .001

| Quad | % Gated | % Total | X Geo Mean |
|------|---------|---------|------------|
| UL   | 99.75   | 91.95   | 1.46       |
| UR   | 0.25    | 0.23    | 15.56      |

DMSO

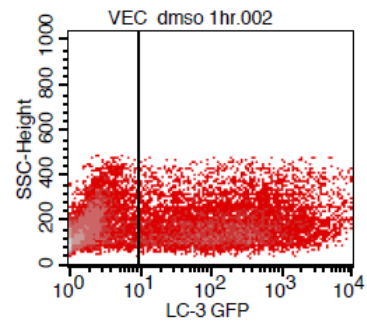

File: VEC dms0 1hr.002

| Quad | % Gated | % Total | X Geo Mean |
|------|---------|---------|------------|
| UL   | 53.24   | 49.50   | 1.83       |
| UR   | 46.76   | 43.47   | 177.04     |

MPA

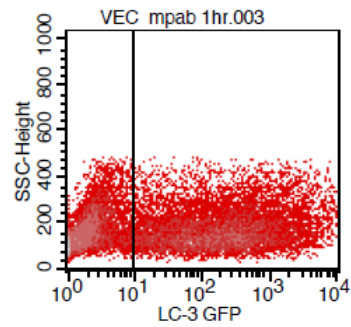

File: VEC mpab 1hr.003

| Quad | % Gated | % Total | X Geo Mean |
|------|---------|---------|------------|
| UL   | 40.27   | 37.62   | 2.09       |
| UR   | 59.73   | 55.79   | 187.85     |

Unstaining

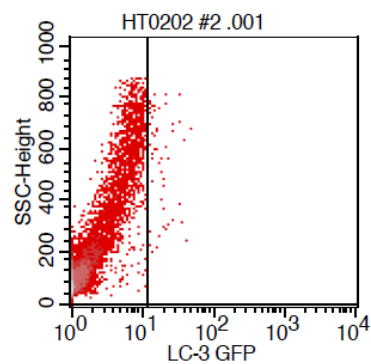

File: HT0202 #2 .001

| Quad | % Gated | % Total | X Geo Mean |
|------|---------|---------|------------|
| UL   | 99.14   | 91.90   | 1.60       |
| UR   | 0.86    | 0.80    | 15.68      |
| ...  | ...     | ...     | ...        |

DMSO

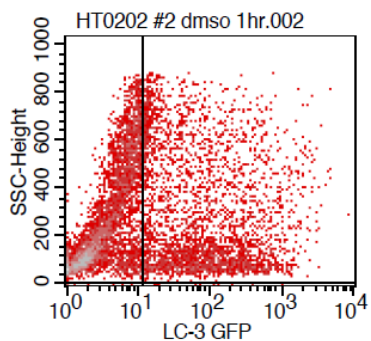

File: HT0202 #2 dms0 1hr.002

| Quad | % Gated | % Total | X Geo Mean |
|------|---------|---------|------------|
| UL   | 60.06   | 51.86   | 3.40       |
| UR   | 39.93   | 34.48   | 78.16      |

MPA

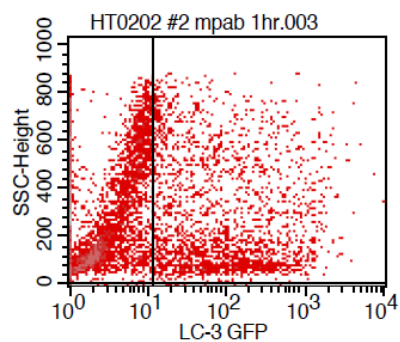

File: HT0202 #2 mpab 1hr.003

| Quad | % Gated | % Total | X Geo Mean |
|------|---------|---------|------------|
| UL   | 73.04   | 58.67   | 1.97       |
| UR   | 26.81   | 21.54   | 81.27      |

Unstaining

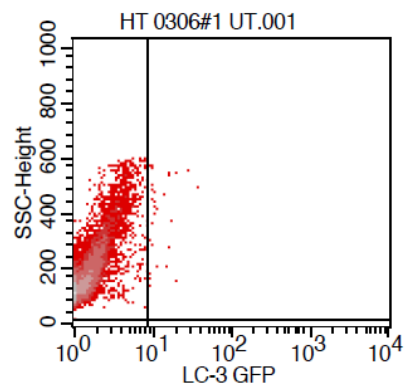

File: HT 0306#1 UT.001

| Quad | % Gated | % Total | X Geo Mean |
|------|---------|---------|------------|
| UL   | 99.69   | 92.68   | 1.59       |
| UR   | 0.31    | 0.29    | 12.17      |

DMSO

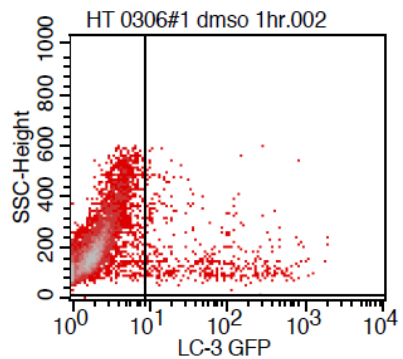

File: HT 0306#1 dms0 1hr.002

| Quad | % Gated | % Total | X Geo Mean |
|------|---------|---------|------------|
| UL   | 94.90   | 88.38   | 1.98       |
| UR   | 5.09    | 4.74    | 52.43      |

MPA

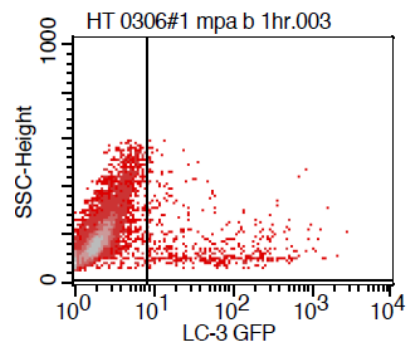

File: HT 0306#1 mpa b 1hr.003

| Quad | % Gated | % Total | X Geo Mean |
|------|---------|---------|------------|
| UL   | 95.18   | 88.71   | 2.04       |
| UR   | 4.82    | 4.49    | 53.64      |

Unstaining

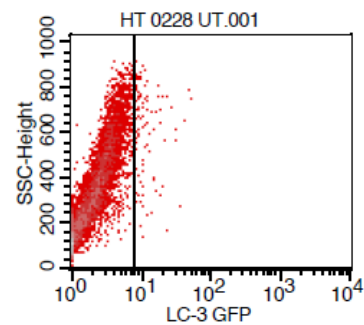

File: HT 0228 UT.001

| Quad | % Gated | % Total | X Geo Mean |
|------|---------|---------|------------|
| UL   | 98.66   | 86.97   | 1.91       |
| UR   | 1.34    | 1.18    | 10.92      |

DMSO

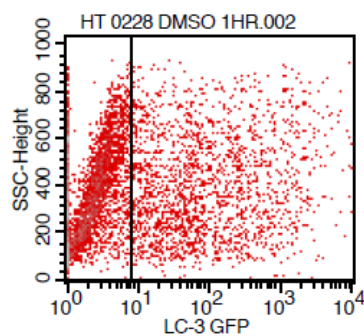

File: HT 0228 DMSO 1HR.002

| Quad | % Gated | % Total | X Geo Mean |
|------|---------|---------|------------|
| UL   | 66.69   | 50.18   | 1.93       |
| UR   | 33.31   | 25.06   | 86.32      |

MPA

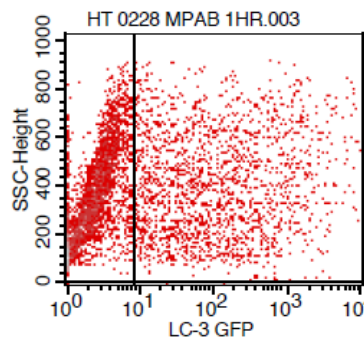

File: HT 0228 MPAB 1HR.003

| Quad | % Gated | % Total | X Geo Mean |
|------|---------|---------|------------|
| UL   | 63.27   | 45.87   | 2.21       |
| UR   | 36.73   | 26.62   | 102.16     |
